# Supplementary material
Source: ML conference proceedings conference paper supplement (https://openreview.net/forum?id=BqOmsYIe7M)

# BiomedCLIP

actinic keratoses and intraepithelial carcinoma

1.0  
0.8  
0.6  
0.4  
0.2

basal cell carcinoma

vascular lesions

benign keratosis-like lesions

melanocytic nevi

dermatofibroma

melanoma

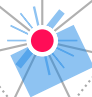

Supplement: supplementary_material [file 845_DermaMNIST_BiomedCLIP_alpha0.9_spider_plot.pdf › efficient-credal-prediction-main/paper_plots/appendix/clip_results/clip_v_biomedclip/845_DermaMNIST_BiomedCLIP_alpha0.9_spider_plot.pdf]
