# Supplementary material
Source: ML conference proceedings conference paper supplement (https://openreview.net/forum?id=BqOmsYIe7M)
Supplement: supplementary_material [file 6252_CIFAR10-FRENCH_CLIP_alpha0.8_spider_plot.pdf › efficient-credal-prediction-main/paper_plots/appendix/clip_results/language/6252_CIFAR10-FRENCH_CLIP_alpha0.8_spider_plot.pdf]

# CLIP

avion

MLE

Credal set

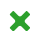

Ground-Truth

camion

bateau

cheval

grenouille

chien

cerf

chat

oiseau

voiture

1.0

0.8

0.6

0.4

0.2
