# Supplementary material
Source: ML conference proceedings conference paper supplement (https://openreview.net/forum?id=BqOmsYIe7M)
Supplement: supplementary_material [file 6750_CIFAR10_CLIP_alpha0.9_spider_plot.pdf › efficient-credal-prediction-main/paper_plots/appendix/clip_results/model_comparison/6750_CIFAR10_CLIP_alpha0.9_spider_plot.pdf]

**CLIP**

airplane

● MLE

■ Credal set

✕ Ground-Truth

truck

ship

horse

frog

dog

deer

cat

bird

automobile

1.0

0.8

0.6

0.4

0.2
