# Supplementary material
Source: ML conference proceedings conference paper supplement (https://openreview.net/forum?id=BqOmsYIe7M)
Supplement: supplementary_material [file all_legends.pdf › efficient-credal-prediction-main/paper_plots/main_paper/cov_eff/all_legends.pdf]

**Ours** EffCre**Baselines** CreRL CreEns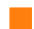

CreBNN

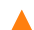

CreWra

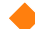

CreNet

**Ours** EffCre**Baselines** CreRL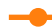

CreEns

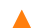

CreWra

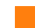

CreBNN

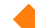

CreNet

**Ours** EffCre**Baselines** CreRL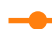

CreEns

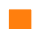

CreBNN

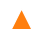

CreWra

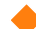

CreNet
