# Supplementary material
Source: ML conference proceedings conference paper supplement (https://openreview.net/forum?id=BqOmsYIe7M)

# Input

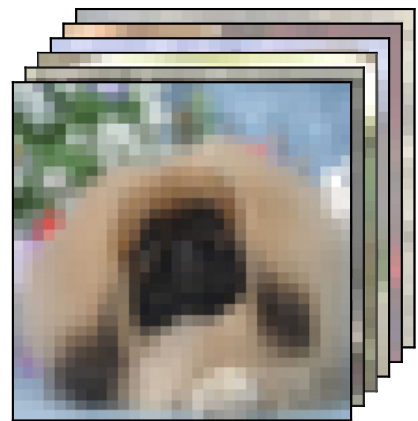

A photo of a [LABEL].

cat

dog

frog

...

probabilistic  
classifier

(CLIP, SigLIP, ResNet, ...)

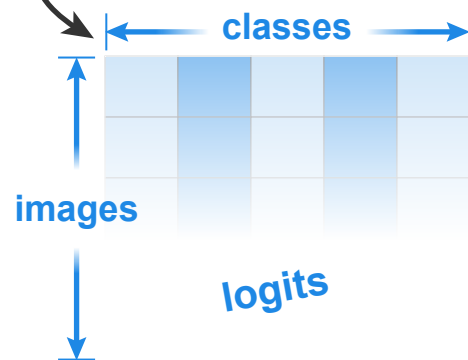

# Decalibration

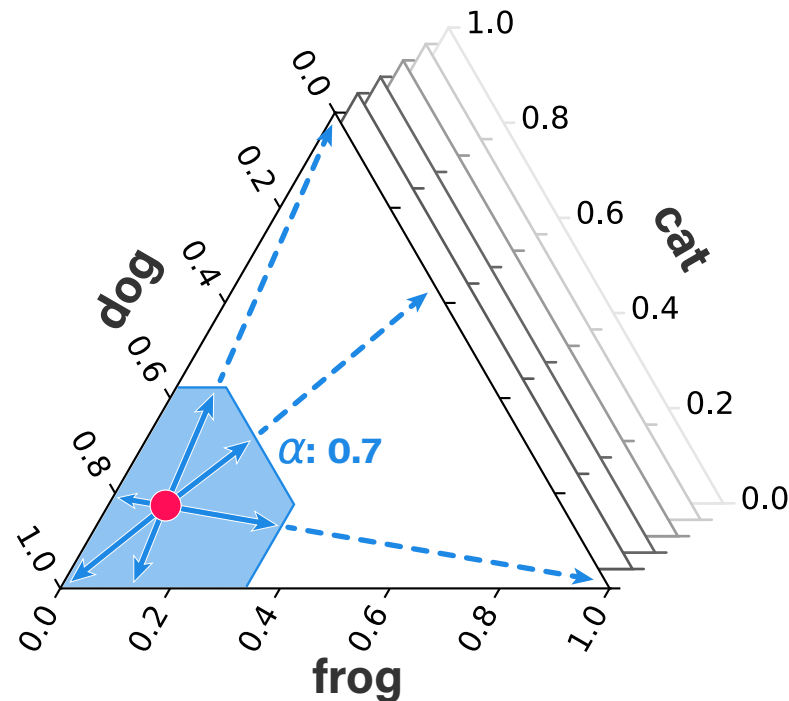

# Credal Prediction

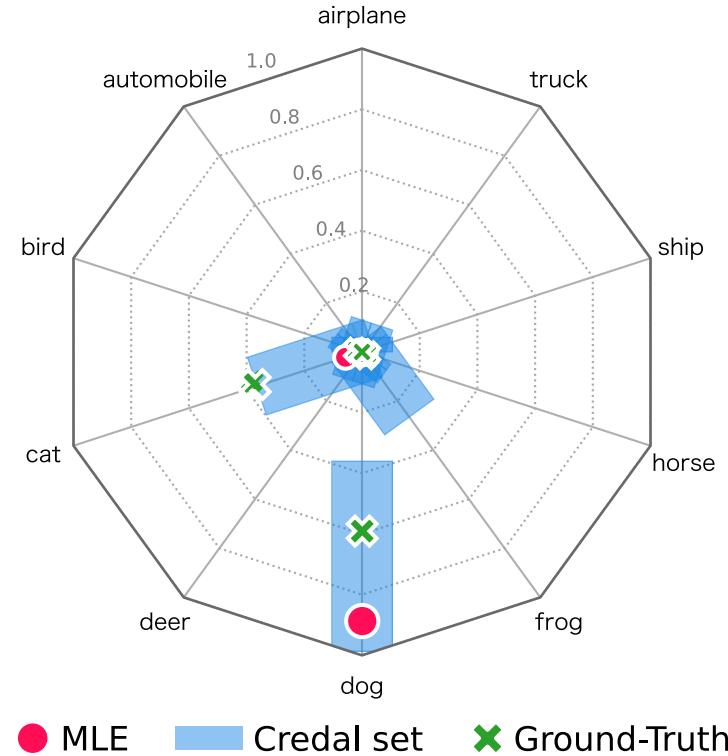

Supplement: supplementary_material [file figure_1.pdf › efficient-credal-prediction-main/paper_plots/main_paper/figure_1.pdf]
