# Supplementary material
Source: ML conference proceedings conference paper supplement (https://openreview.net/forum?id=BqOmsYIe7M)

# BiomedCLIP

actinic keratoses and intraepithelial carcinoma

MLE  
Credal set

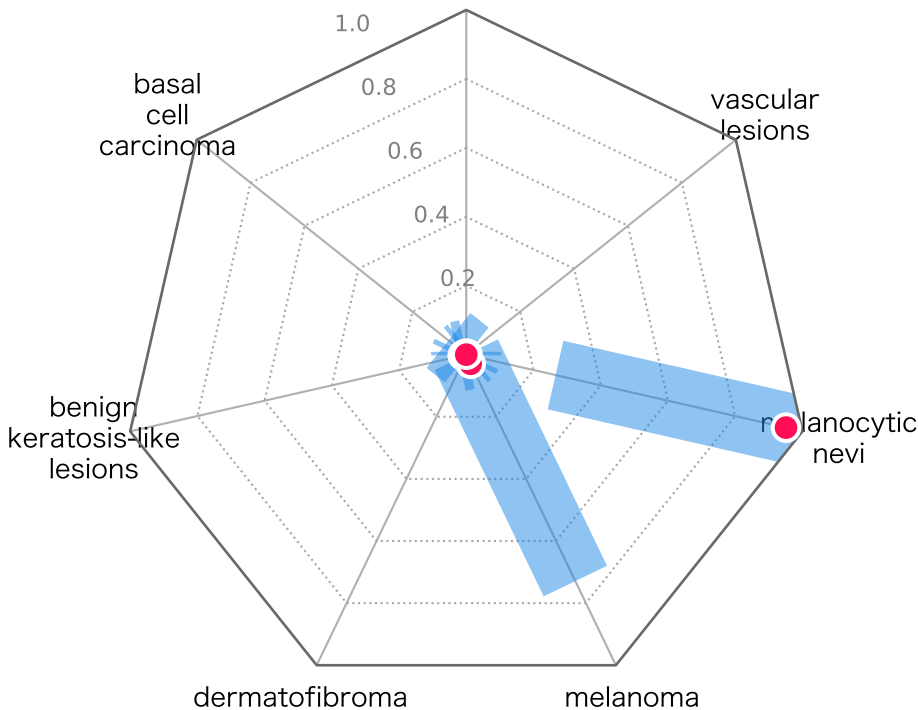

Supplement: supplementary_material [file 1187_DermaMNIST_BiomedCLIP_alpha0.9_spider_plot.pdf › efficient-credal-prediction-main/paper_plots/appendix/clip_results/clip_v_biomedclip/1187_DermaMNIST_BiomedCLIP_alpha0.9_spider_plot.pdf]

# CLIP

actinic keratoses and intraepithelial carcinoma

MLE  
Credal set

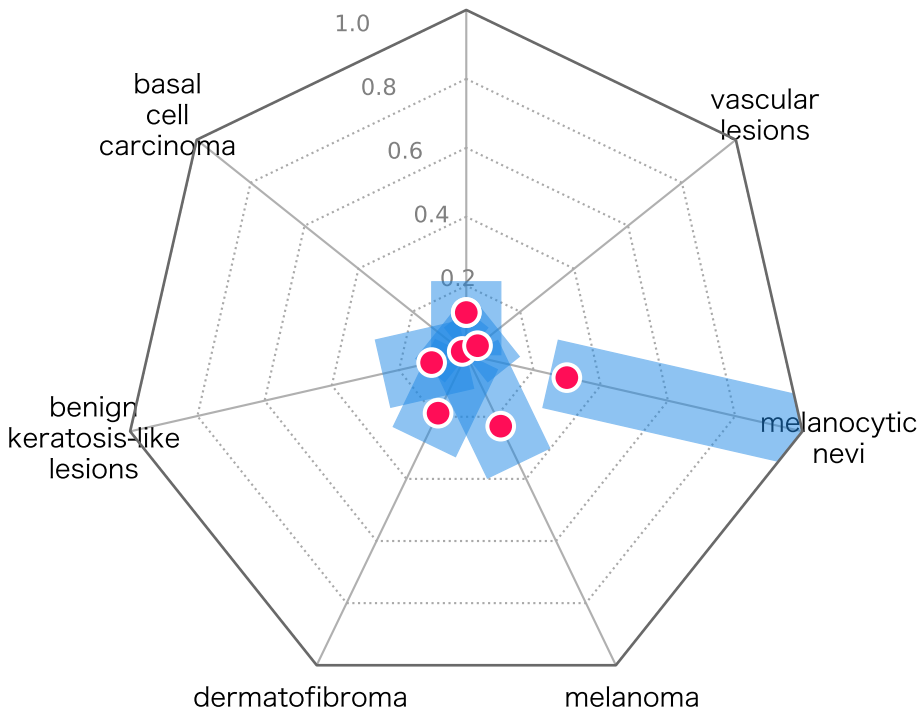

Supplement: supplementary_material [file 1187_DermaMNIST_CLIP_alpha0.9_spider_plot.pdf › efficient-credal-prediction-main/paper_plots/appendix/clip_results/clip_v_biomedclip/1187_DermaMNIST_CLIP_alpha0.9_spider_plot.pdf]

DermaMNIST label: melanocytic nevi

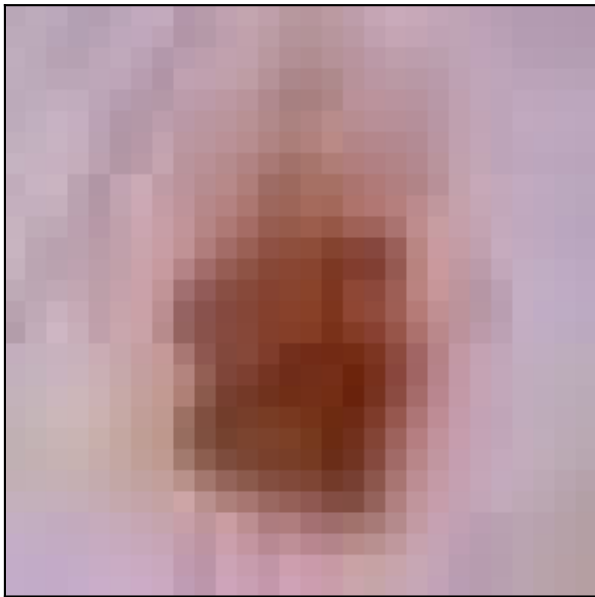

Supplement: supplementary_material [file 1187_DermaMNIST_image.pdf › efficient-credal-prediction-main/paper_plots/appendix/clip_results/clip_v_biomedclip/1187_DermaMNIST_image.pdf]

# CLIP

actinic keratoses and intraepithelial carcinoma

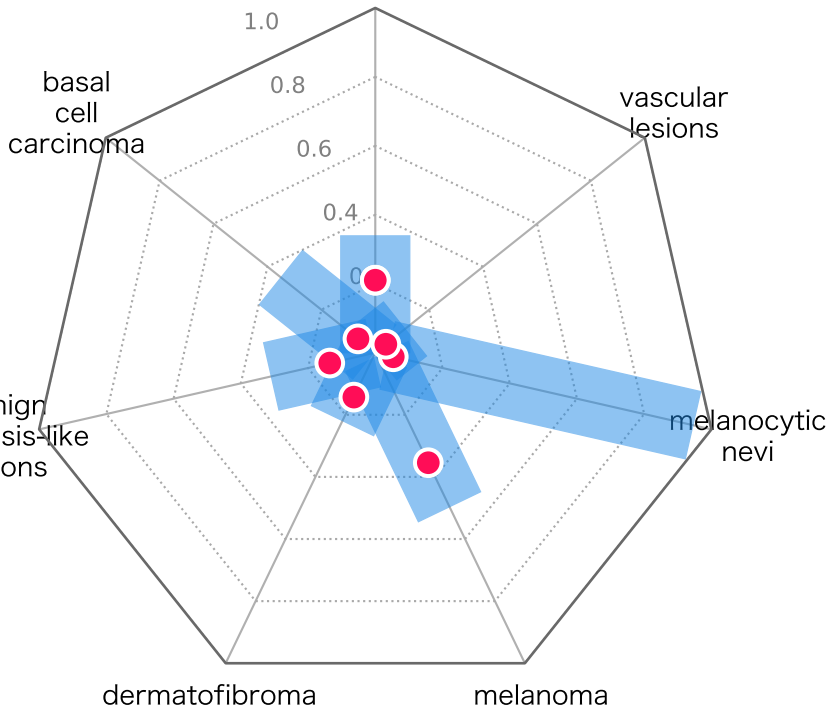

Supplement: supplementary_material [file 845_DermaMNIST_CLIP_alpha0.9_spider_plot.pdf › efficient-credal-prediction-main/paper_plots/appendix/clip_results/clip_v_biomedclip/845_DermaMNIST_CLIP_alpha0.9_spider_plot.pdf]

DermaMNIST label: melanoma

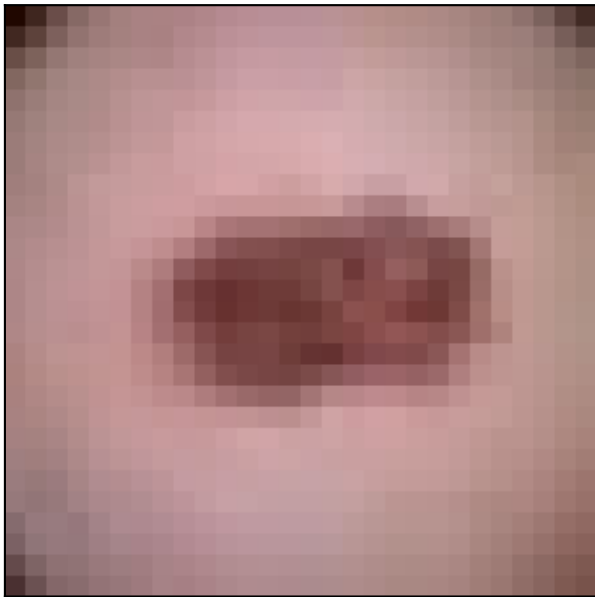

Supplement: supplementary_material [file 845_DermaMNIST_image.pdf › efficient-credal-prediction-main/paper_plots/appendix/clip_results/clip_v_biomedclip/845_DermaMNIST_image.pdf]

# CLIP

飞机

MLE

Credal set

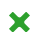

Ground-Truth

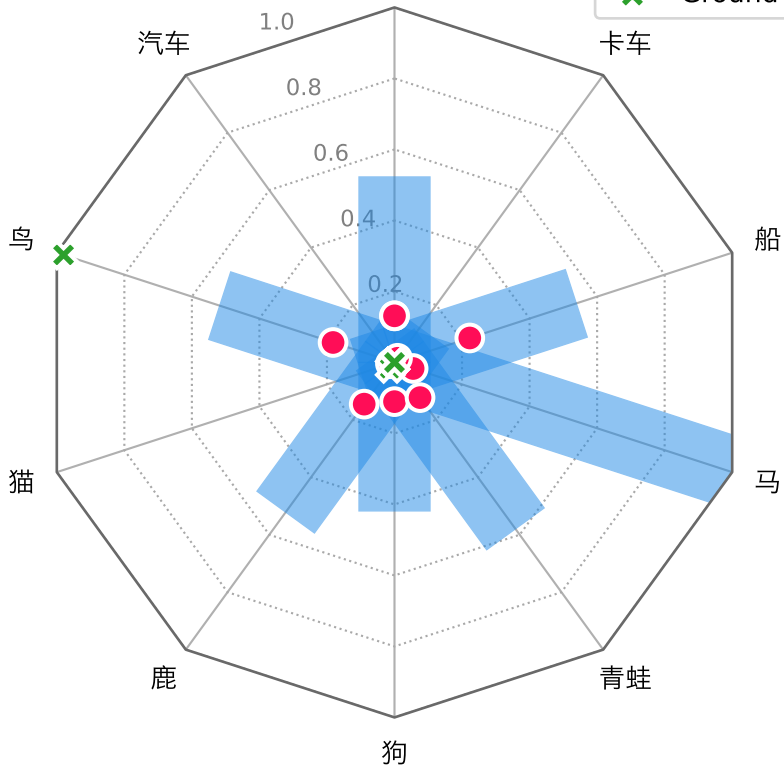

Supplement: supplementary_material [file 6252_CIFAR10-CHINESE_CLIP_alpha0.8_spider_plot.pdf › efficient-credal-prediction-main/paper_plots/appendix/clip_results/language/6252_CIFAR10-CHINESE_CLIP_alpha0.8_spider_plot.pdf]

CLIP

飞机

MLE

Credal set

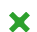

Ground-Truth

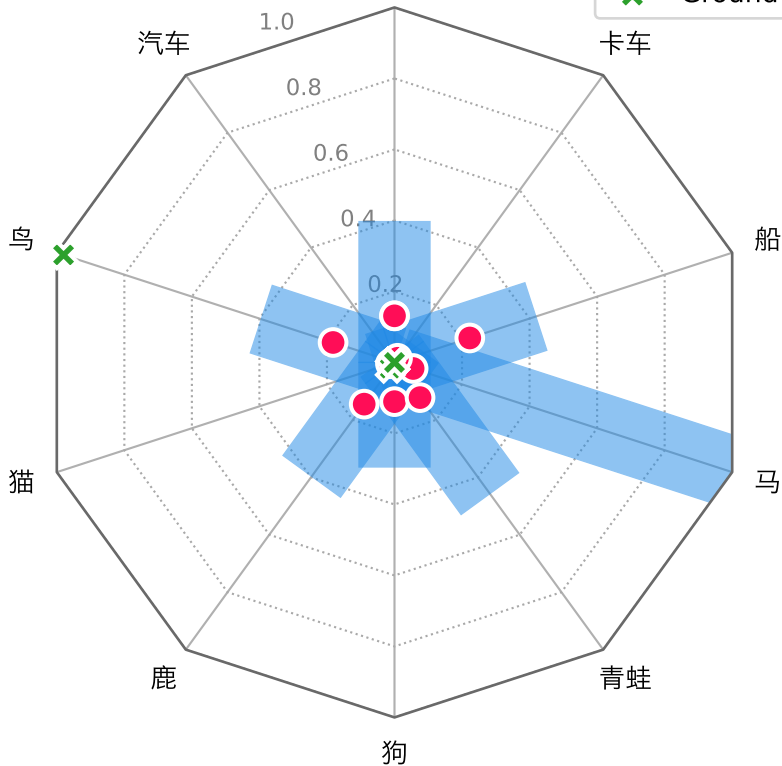

Supplement: supplementary_material [file 6252_CIFAR10-CHINESE_CLIP_alpha0.9_spider_plot.pdf › efficient-credal-prediction-main/paper_plots/appendix/clip_results/language/6252_CIFAR10-CHINESE_CLIP_alpha0.9_spider_plot.pdf]

# SigLIP2

飞机

MLE

Credal set

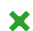

Ground-Truth

卡车

船

马

青蛙

狗

鹿

猫

鸟

汽车

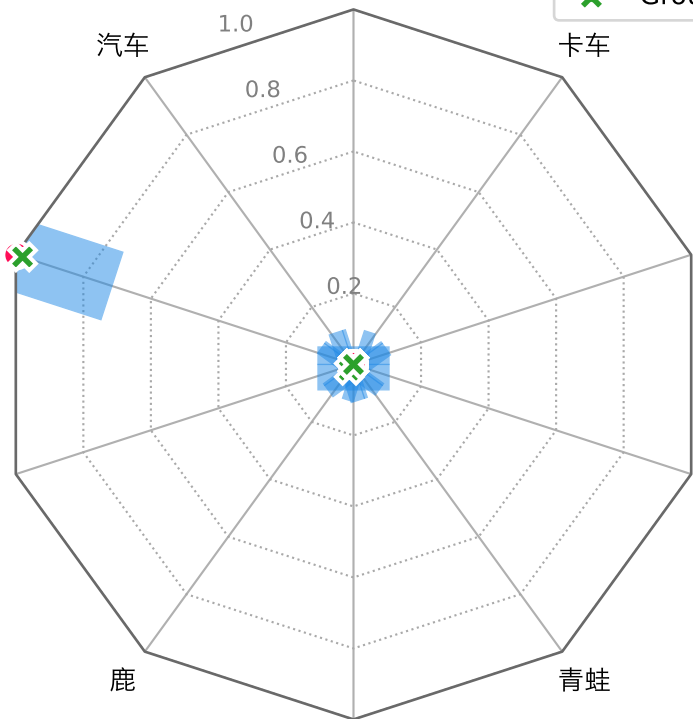

Supplement: supplementary_material [file 6252_CIFAR10-CHINESE_SigLIP2_alpha0.8_spider_plot.pdf › efficient-credal-prediction-main/paper_plots/appendix/clip_results/language/6252_CIFAR10-CHINESE_SigLIP2_alpha0.8_spider_plot.pdf]

# SigLIP2

飞机

MLE

Credal set

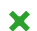

Ground-Truth

卡车

船

马

青蛙

狗

鹿

猫

鸟

汽车

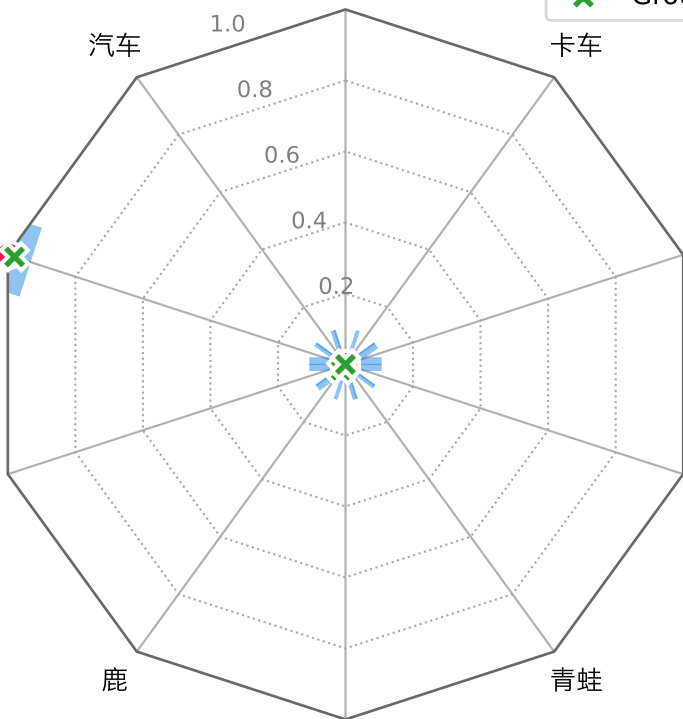

Supplement: supplementary_material [file 6252_CIFAR10-CHINESE_SigLIP2_alpha0.9_spider_plot.pdf › efficient-credal-prediction-main/paper_plots/appendix/clip_results/language/6252_CIFAR10-CHINESE_SigLIP2_alpha0.9_spider_plot.pdf]

# SigLIP

飞机

MLE

Credal set



Ground-Truth

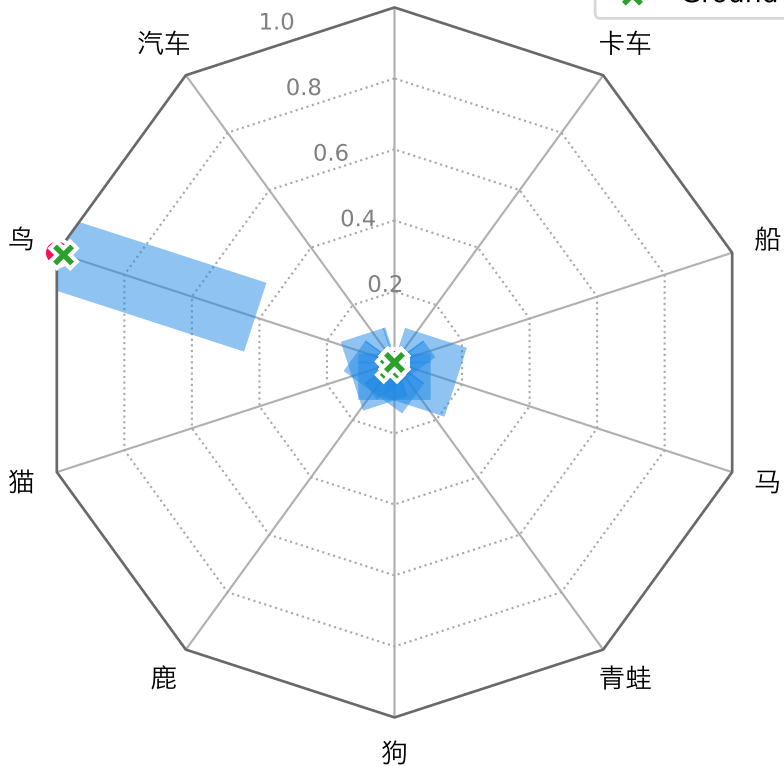

Supplement: supplementary_material [file 6252_CIFAR10-CHINESE_SigLIP_alpha0.8_spider_plot.pdf › efficient-credal-prediction-main/paper_plots/appendix/clip_results/language/6252_CIFAR10-CHINESE_SigLIP_alpha0.8_spider_plot.pdf]

# SigLIP

飞机

MLE

Credal set



Ground-Truth

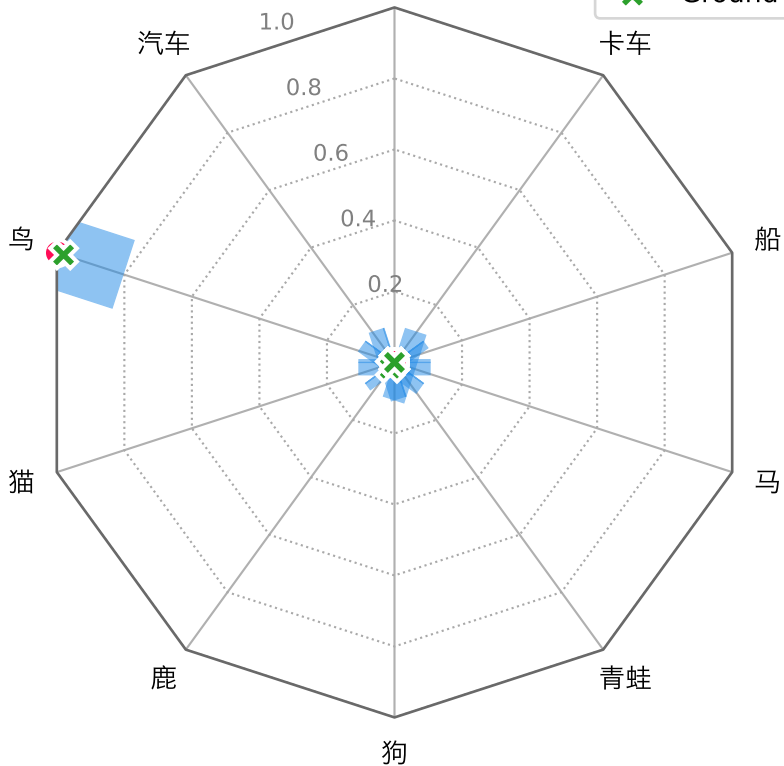

Supplement: supplementary_material [file 6252_CIFAR10-CHINESE_SigLIP_alpha0.9_spider_plot.pdf › efficient-credal-prediction-main/paper_plots/appendix/clip_results/language/6252_CIFAR10-CHINESE_SigLIP_alpha0.9_spider_plot.pdf]

**CLIP**

avion

MLE

Credal set

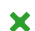

Ground-Truth

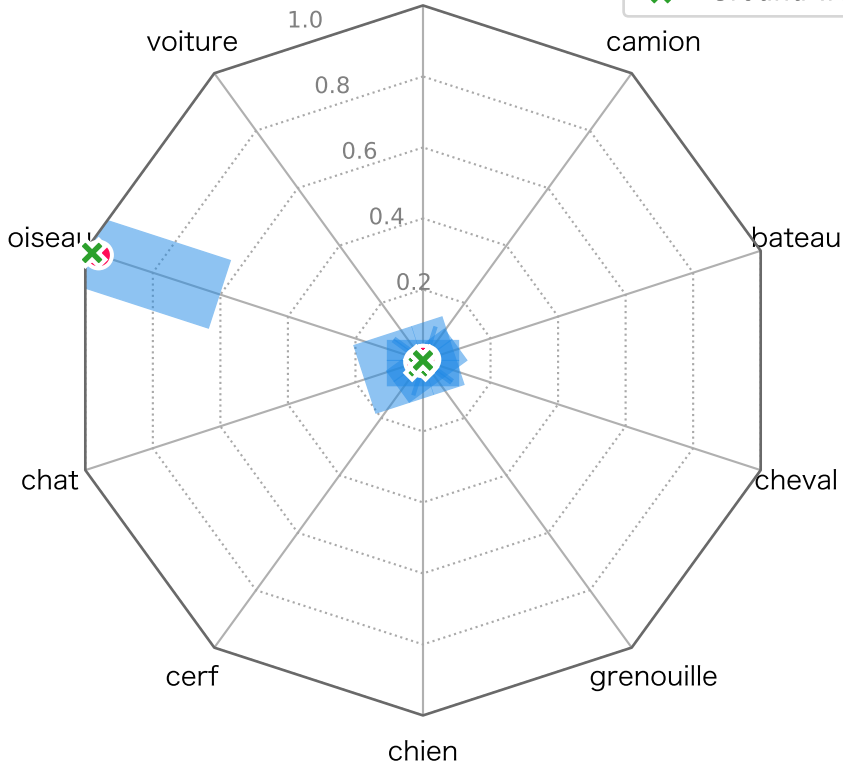

Supplement: supplementary_material [file 6252_CIFAR10-FRENCH_CLIP_alpha0.9_spider_plot.pdf › efficient-credal-prediction-main/paper_plots/appendix/clip_results/language/6252_CIFAR10-FRENCH_CLIP_alpha0.9_spider_plot.pdf]

# SigLIP2

avion

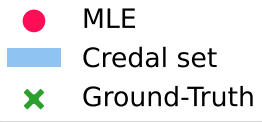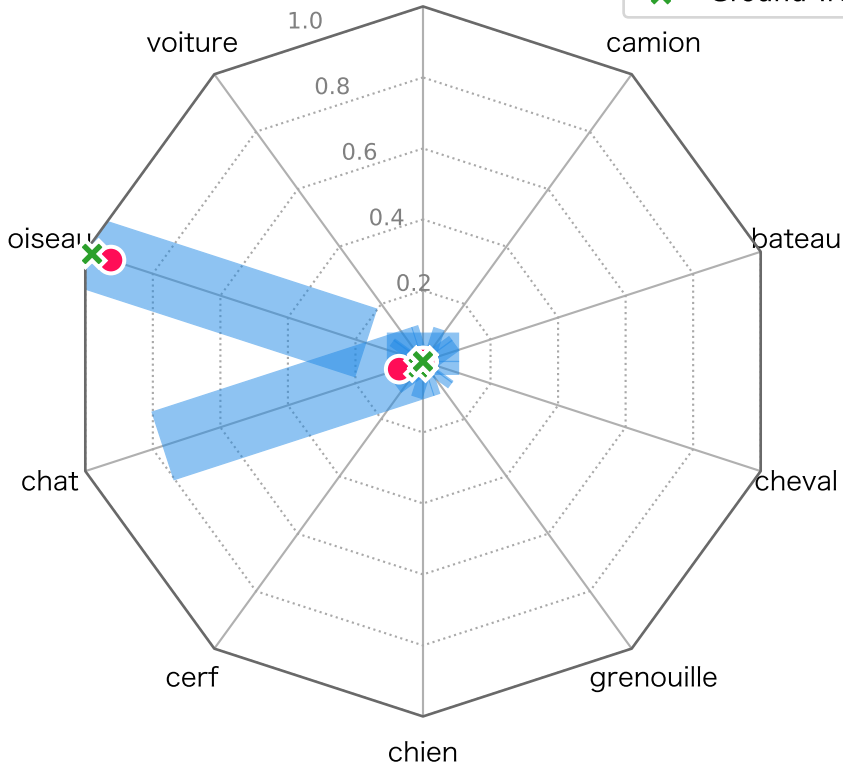

Supplement: supplementary_material [file 6252_CIFAR10-FRENCH_SigLIP2_alpha0.8_spider_plot.pdf › efficient-credal-prediction-main/paper_plots/appendix/clip_results/language/6252_CIFAR10-FRENCH_SigLIP2_alpha0.8_spider_plot.pdf]

# SigLIP2

avion

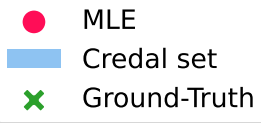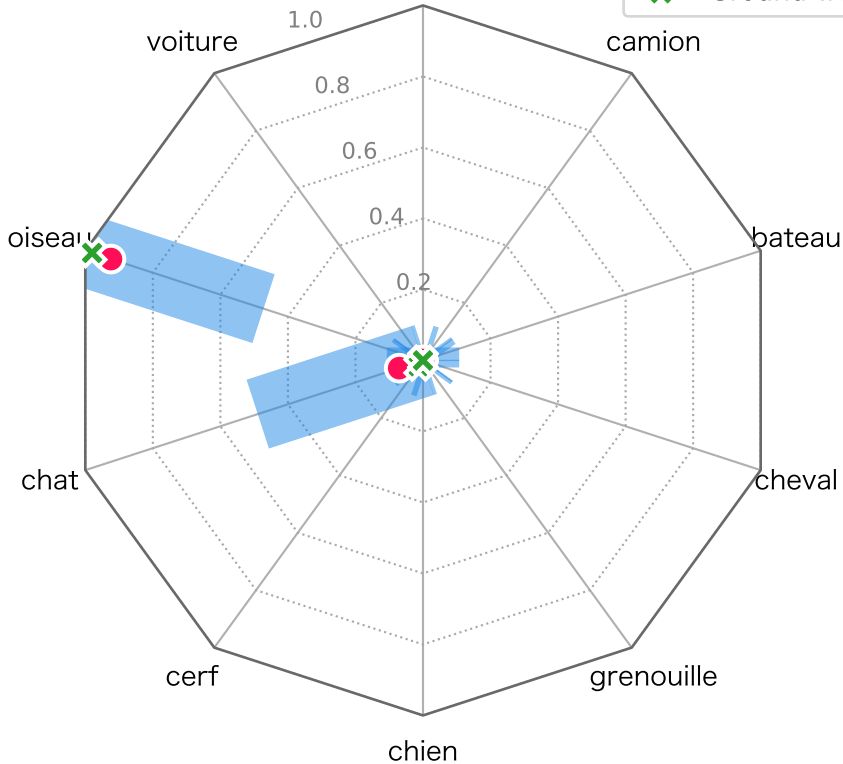

Supplement: supplementary_material [file 6252_CIFAR10-FRENCH_SigLIP2_alpha0.9_spider_plot.pdf › efficient-credal-prediction-main/paper_plots/appendix/clip_results/language/6252_CIFAR10-FRENCH_SigLIP2_alpha0.9_spider_plot.pdf]

# SigLIP

avion

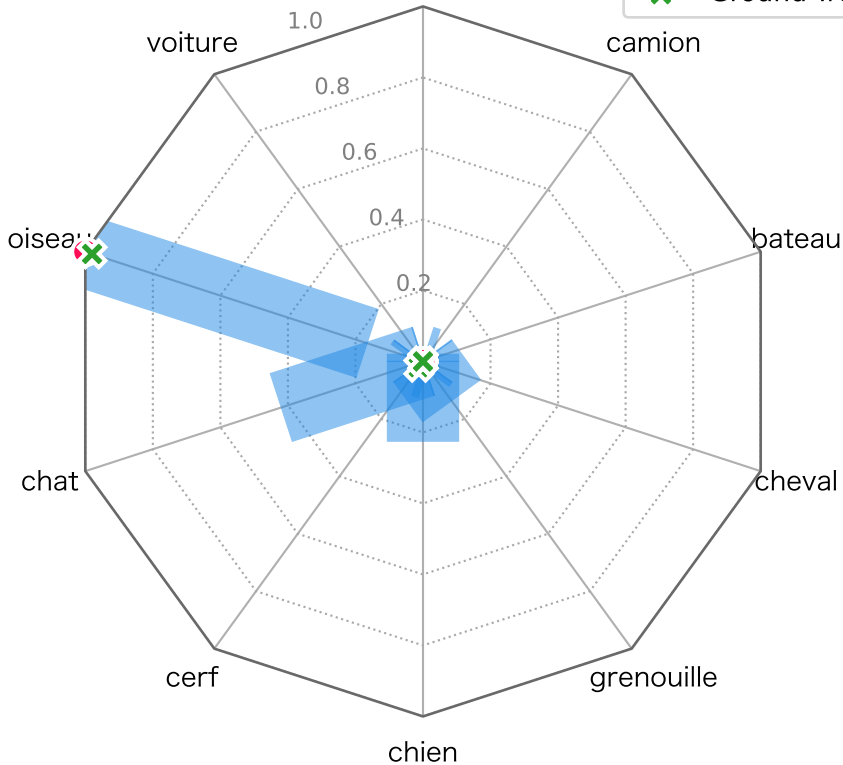

Supplement: supplementary_material [file 6252_CIFAR10-FRENCH_SigLIP_alpha0.8_spider_plot.pdf › efficient-credal-prediction-main/paper_plots/appendix/clip_results/language/6252_CIFAR10-FRENCH_SigLIP_alpha0.8_spider_plot.pdf]

# SigLIP

avion

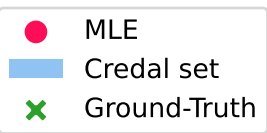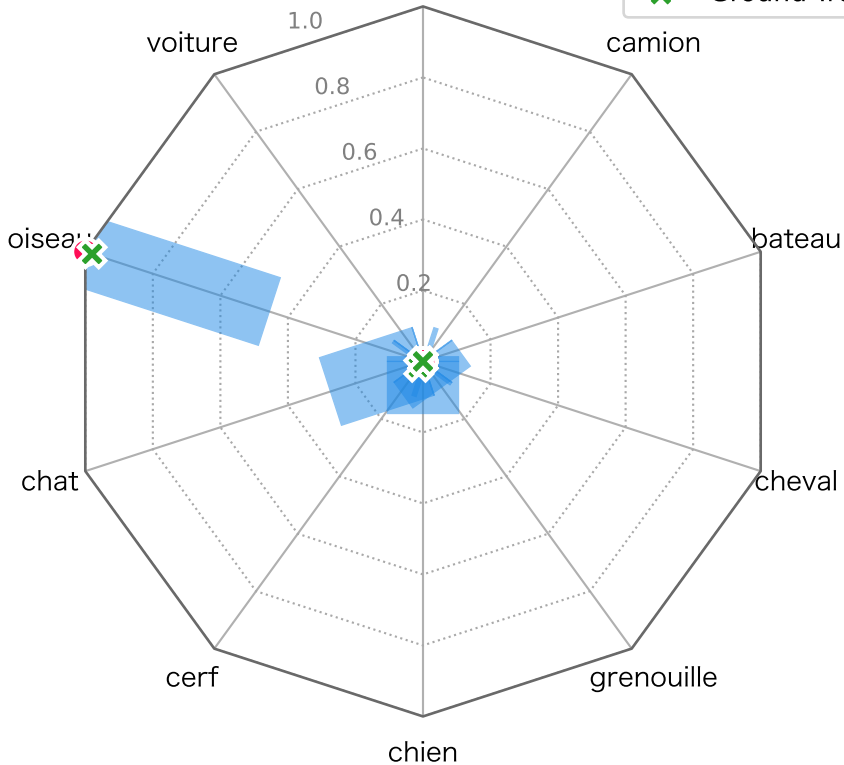

Supplement: supplementary_material [file 6252_CIFAR10-FRENCH_SigLIP_alpha0.9_spider_plot.pdf › efficient-credal-prediction-main/paper_plots/appendix/clip_results/language/6252_CIFAR10-FRENCH_SigLIP_alpha0.9_spider_plot.pdf]

**CLIP**

ndege

● MLE

■ Credal set

✕ Ground-Truth

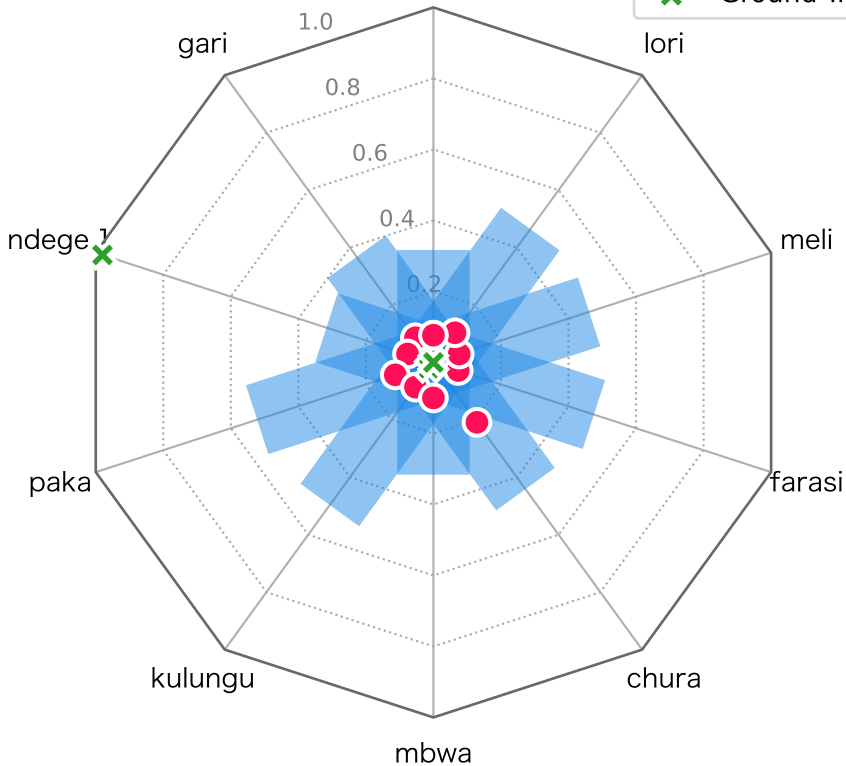

Supplement: supplementary_material [file 6252_CIFAR10-SWAHILI_CLIP_alpha0.8_spider_plot.pdf › efficient-credal-prediction-main/paper_plots/appendix/clip_results/language/6252_CIFAR10-SWAHILI_CLIP_alpha0.8_spider_plot.pdf]

# CLIP

ndege

- MLE
- Credal set
- Ground-Truth

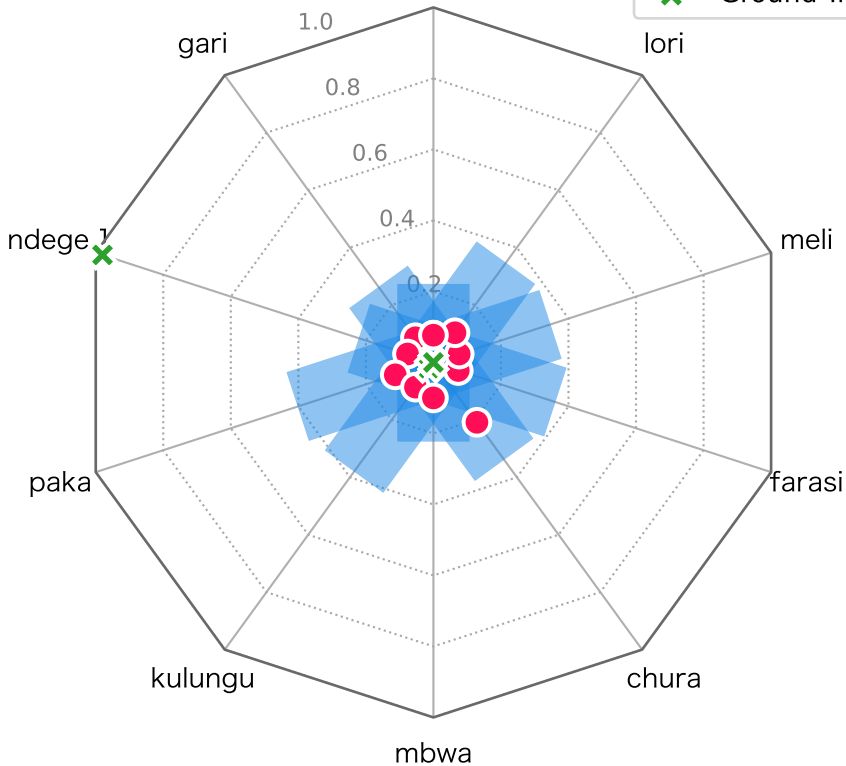

Supplement: supplementary_material [file 6252_CIFAR10-SWAHILI_CLIP_alpha0.9_spider_plot.pdf › efficient-credal-prediction-main/paper_plots/appendix/clip_results/language/6252_CIFAR10-SWAHILI_CLIP_alpha0.9_spider_plot.pdf]

# SigLIP2

ndege

- MLE
- Credal set
- Ground-Truth

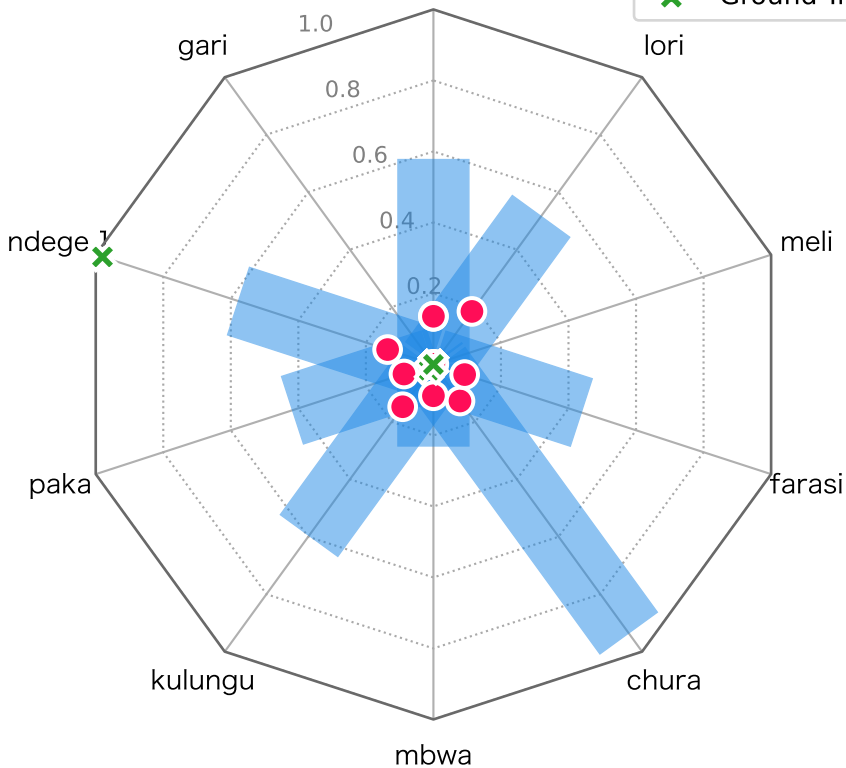

Supplement: supplementary_material [file 6252_CIFAR10-SWAHILI_SigLIP2_alpha0.8_spider_plot.pdf › efficient-credal-prediction-main/paper_plots/appendix/clip_results/language/6252_CIFAR10-SWAHILI_SigLIP2_alpha0.8_spider_plot.pdf]

# SigLIP2

ndege

- MLE
- Credal set
- Ground-Truth

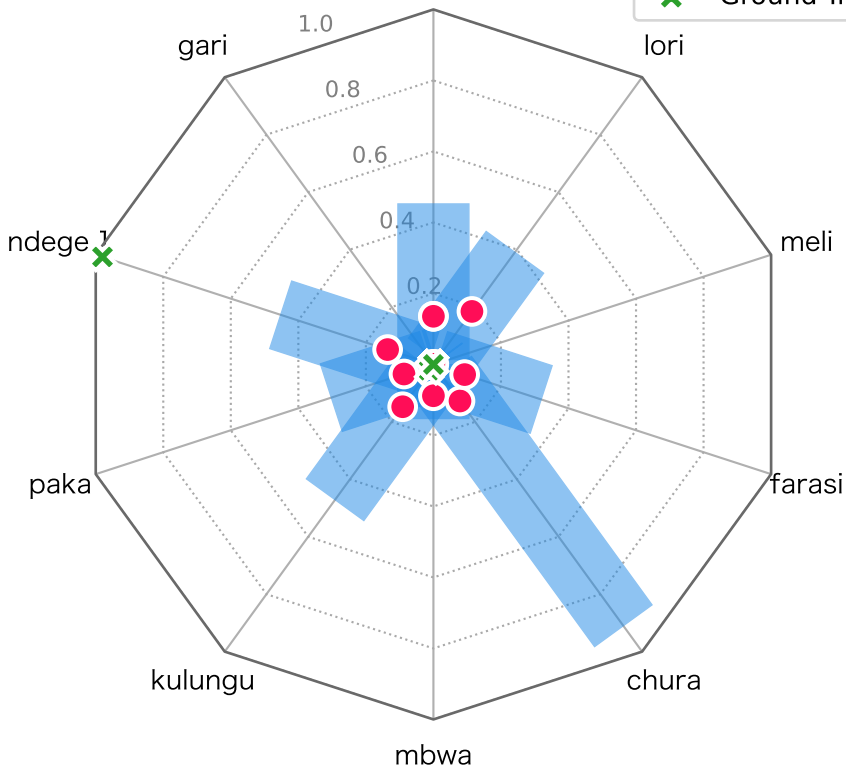

Supplement: supplementary_material [file 6252_CIFAR10-SWAHILI_SigLIP2_alpha0.9_spider_plot.pdf › efficient-credal-prediction-main/paper_plots/appendix/clip_results/language/6252_CIFAR10-SWAHILI_SigLIP2_alpha0.9_spider_plot.pdf]

# SigLIP

ndege

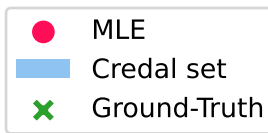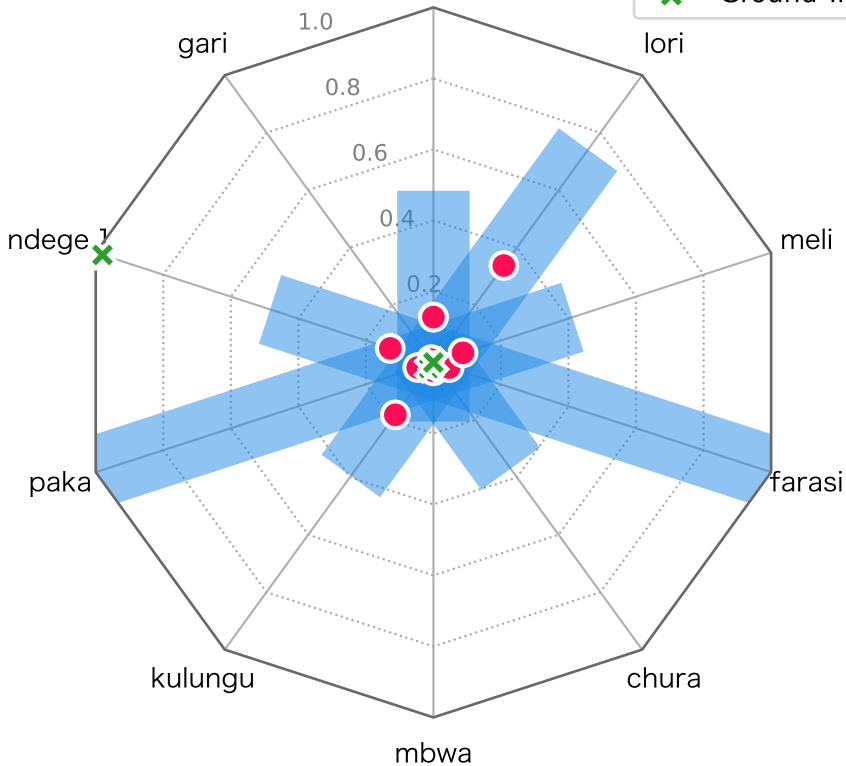

Supplement: supplementary_material [file 6252_CIFAR10-SWAHILI_SigLIP_alpha0.8_spider_plot.pdf › efficient-credal-prediction-main/paper_plots/appendix/clip_results/language/6252_CIFAR10-SWAHILI_SigLIP_alpha0.8_spider_plot.pdf]

# SigLIP

ndege

- MLE
- Credal set
- Ground-Truth

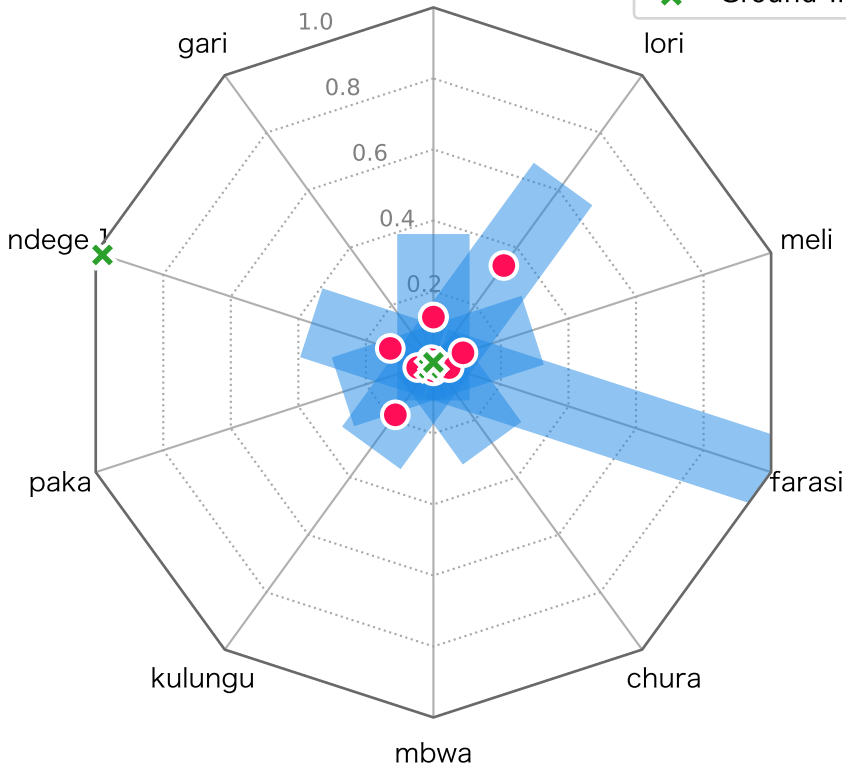

Supplement: supplementary_material [file 6252_CIFAR10-SWAHILI_SigLIP_alpha0.9_spider_plot.pdf › efficient-credal-prediction-main/paper_plots/appendix/clip_results/language/6252_CIFAR10-SWAHILI_SigLIP_alpha0.9_spider_plot.pdf]

# CLIP

airplane

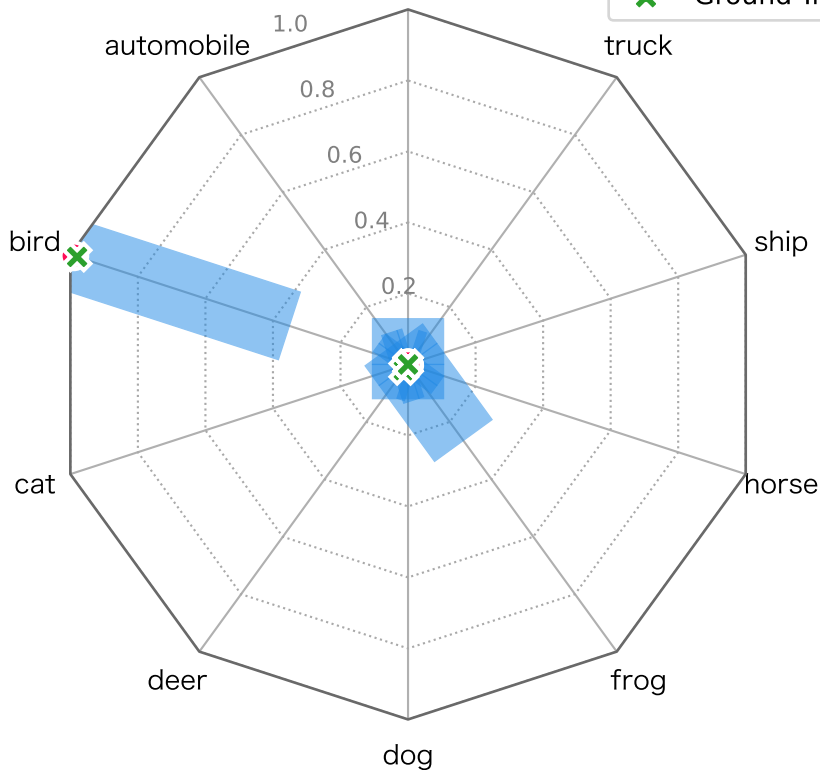

Supplement: supplementary_material [file 6252_CIFAR10_CLIP_alpha0.8_spider_plot.pdf › efficient-credal-prediction-main/paper_plots/appendix/clip_results/language/6252_CIFAR10_CLIP_alpha0.8_spider_plot.pdf]

# CLIP

airplane

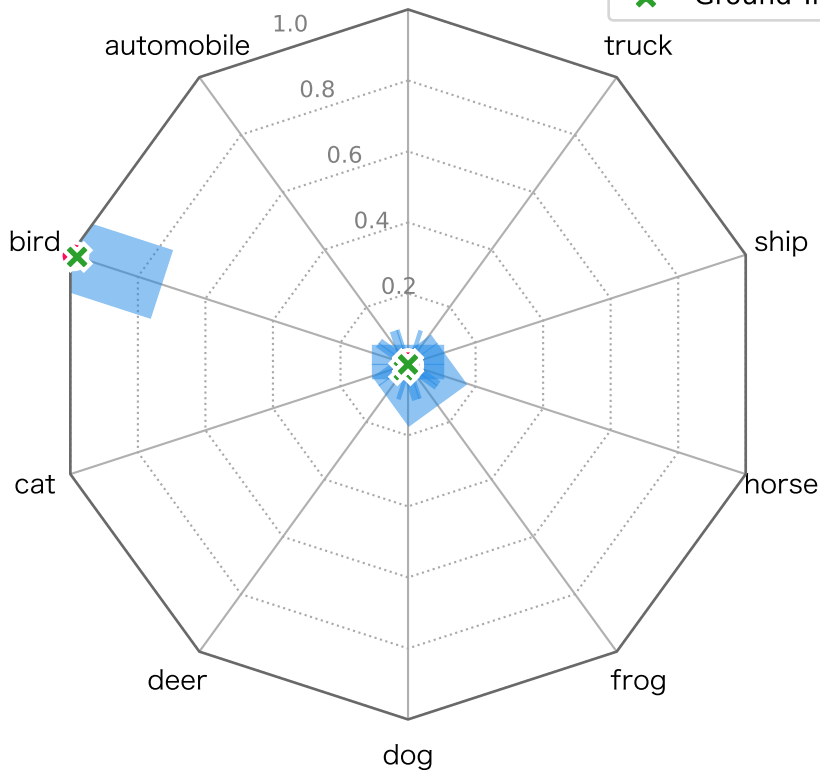

Supplement: supplementary_material [file 6252_CIFAR10_CLIP_alpha0.9_spider_plot.pdf › efficient-credal-prediction-main/paper_plots/appendix/clip_results/language/6252_CIFAR10_CLIP_alpha0.9_spider_plot.pdf]

# SigLIP2

airplane

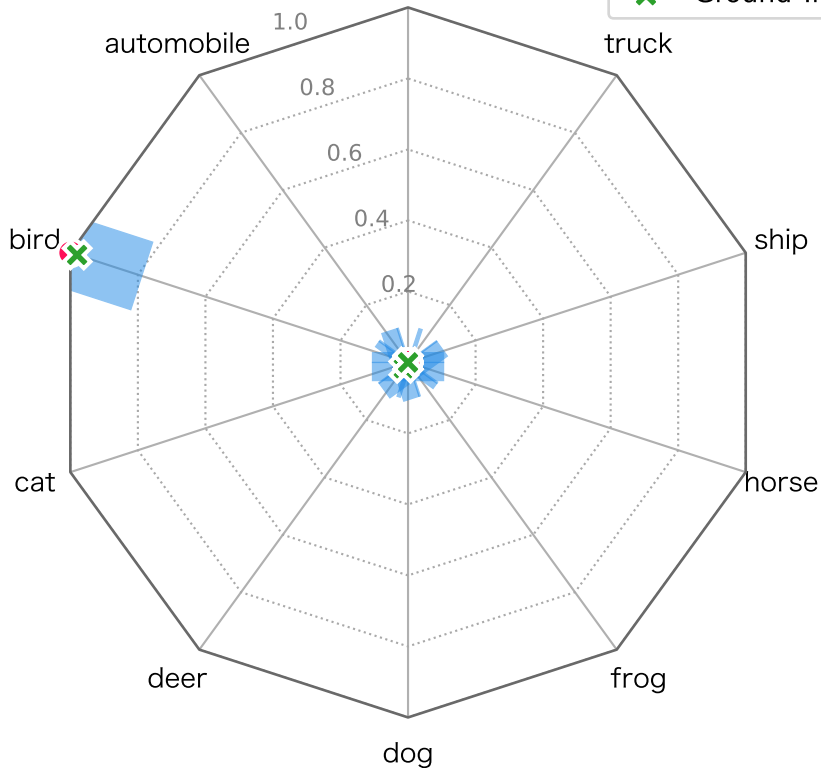

Supplement: supplementary_material [file 6252_CIFAR10_SigLIP2_alpha0.8_spider_plot.pdf › efficient-credal-prediction-main/paper_plots/appendix/clip_results/language/6252_CIFAR10_SigLIP2_alpha0.8_spider_plot.pdf]

# SigLIP2

airplane

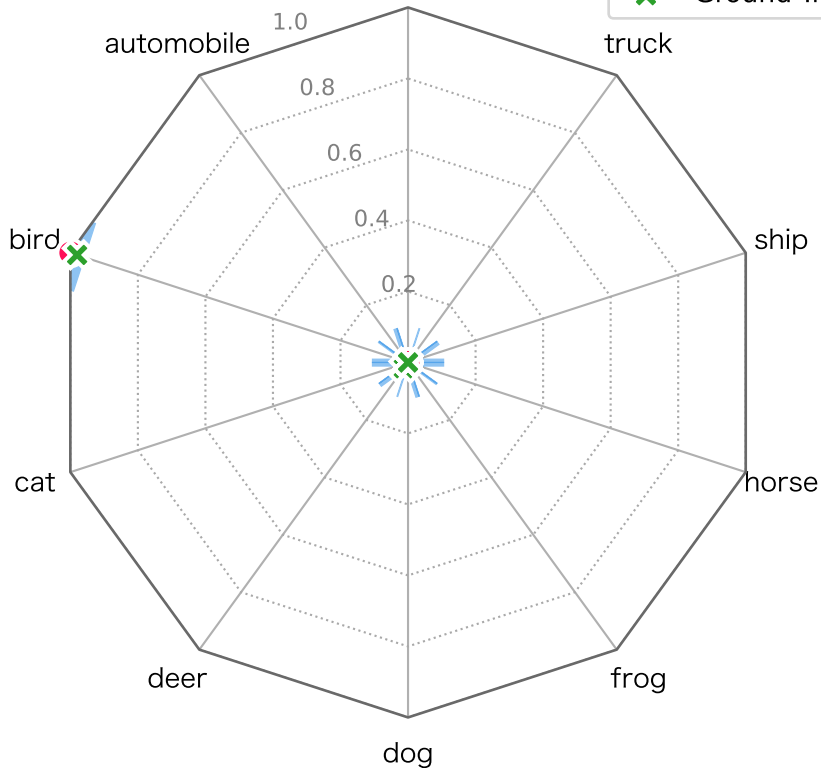

Supplement: supplementary_material [file 6252_CIFAR10_SigLIP2_alpha0.9_spider_plot.pdf › efficient-credal-prediction-main/paper_plots/appendix/clip_results/language/6252_CIFAR10_SigLIP2_alpha0.9_spider_plot.pdf]

# SigLIP

airplane

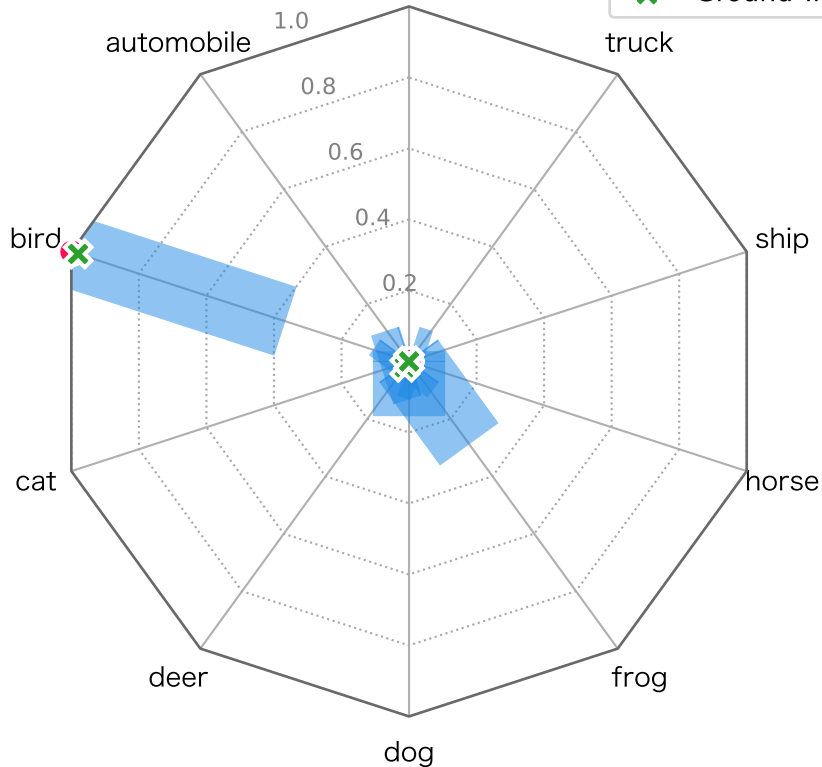

Supplement: supplementary_material [file 6252_CIFAR10_SigLIP_alpha0.8_spider_plot.pdf › efficient-credal-prediction-main/paper_plots/appendix/clip_results/language/6252_CIFAR10_SigLIP_alpha0.8_spider_plot.pdf]

# SigLIP

airplane

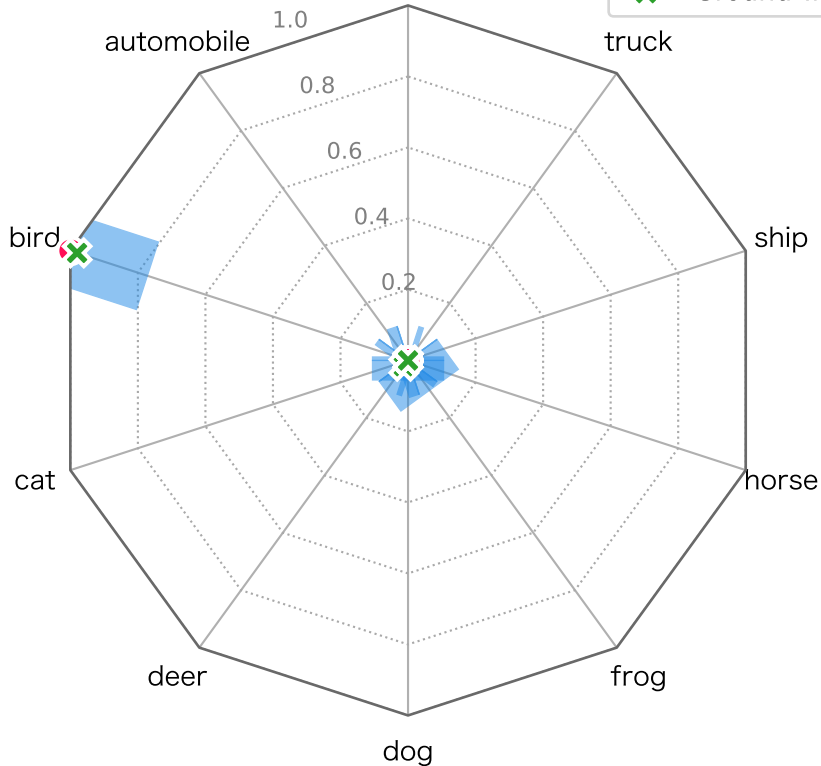

Supplement: supplementary_material [file 6252_CIFAR10_SigLIP_alpha0.9_spider_plot.pdf › efficient-credal-prediction-main/paper_plots/appendix/clip_results/language/6252_CIFAR10_SigLIP_alpha0.9_spider_plot.pdf]

CIFAR10 label: bird

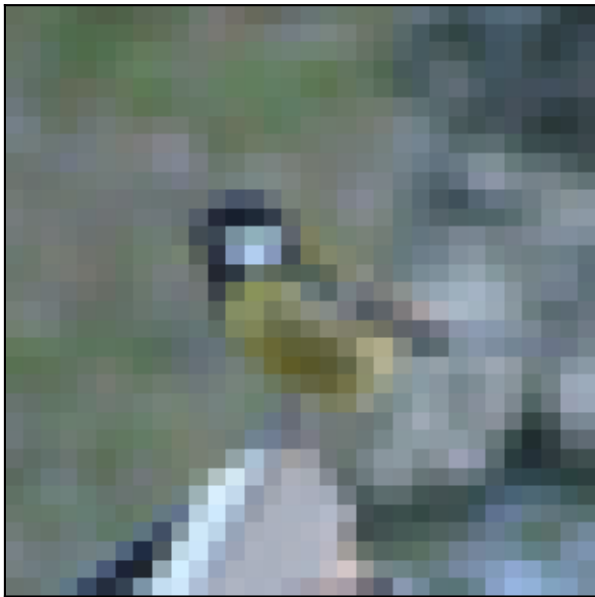

Supplement: supplementary_material [file 6252_CIFAR10_image.pdf › efficient-credal-prediction-main/paper_plots/appendix/clip_results/language/6252_CIFAR10_image.pdf]

# SigLIP2

airplane

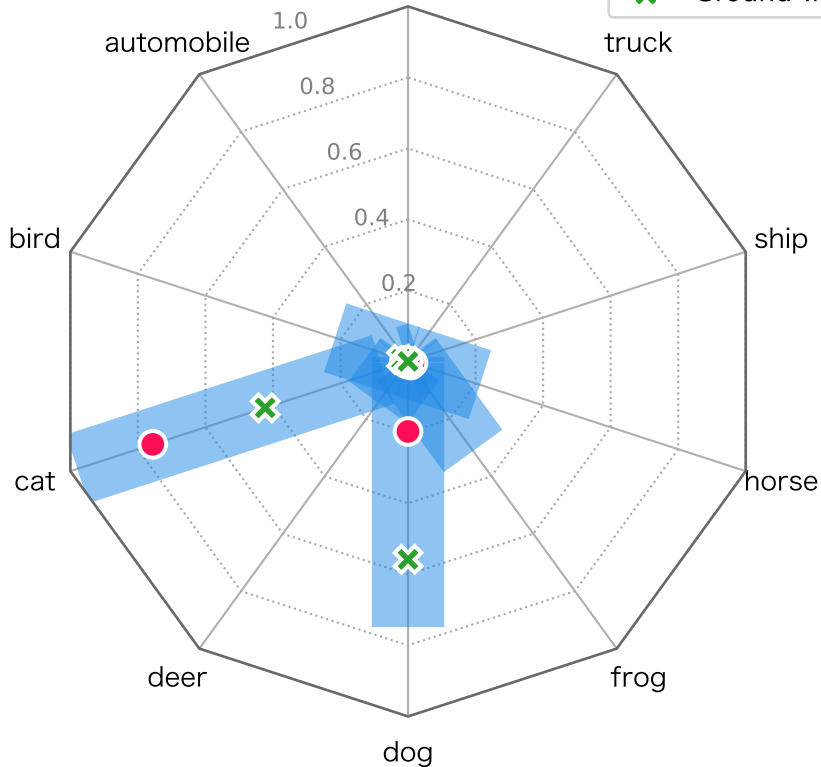

Supplement: supplementary_material [file 2187_CIFAR10_SigLIP2_alpha0.9_spider_plot.pdf › efficient-credal-prediction-main/paper_plots/appendix/clip_results/model_comparison/2187_CIFAR10_SigLIP2_alpha0.9_spider_plot.pdf]

# SigLIP

airplane

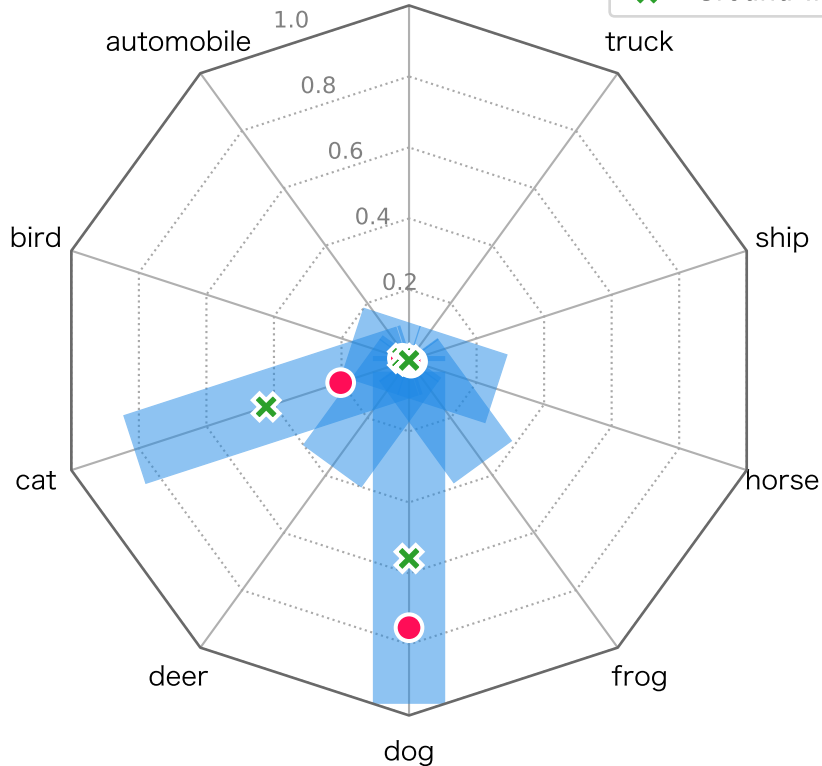

Supplement: supplementary_material [file 2187_CIFAR10_SigLIP_alpha0.9_spider_plot.pdf › efficient-credal-prediction-main/paper_plots/appendix/clip_results/model_comparison/2187_CIFAR10_SigLIP_alpha0.9_spider_plot.pdf]

# SigLIP2

airplane

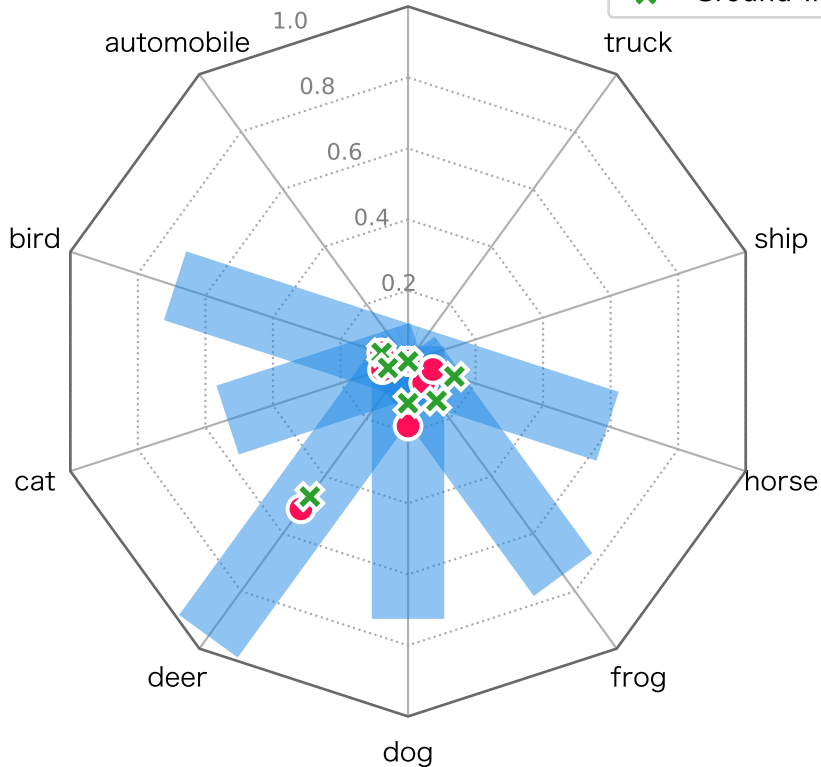

Supplement: supplementary_material [file 5227_CIFAR10_SigLIP2_alpha0.9_spider_plot.pdf › efficient-credal-prediction-main/paper_plots/appendix/clip_results/model_comparison/5227_CIFAR10_SigLIP2_alpha0.9_spider_plot.pdf]

# SigLIP

airplane

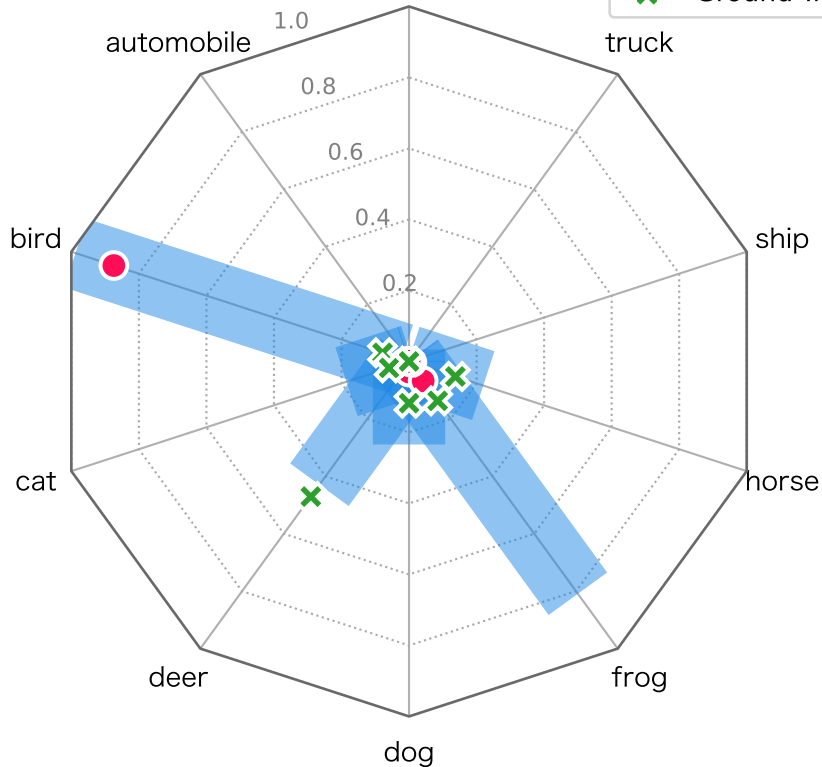

Supplement: supplementary_material [file 5227_CIFAR10_SigLIP_alpha0.9_spider_plot.pdf › efficient-credal-prediction-main/paper_plots/appendix/clip_results/model_comparison/5227_CIFAR10_SigLIP_alpha0.9_spider_plot.pdf]

CIFAR10 label: deer

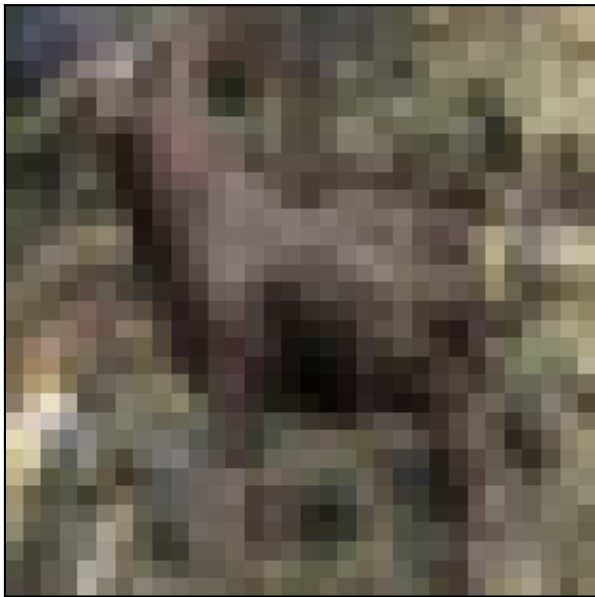

Supplement: supplementary_material [file 5227_CIFAR10_image.pdf › efficient-credal-prediction-main/paper_plots/appendix/clip_results/model_comparison/5227_CIFAR10_image.pdf]

# CLIP

airplane

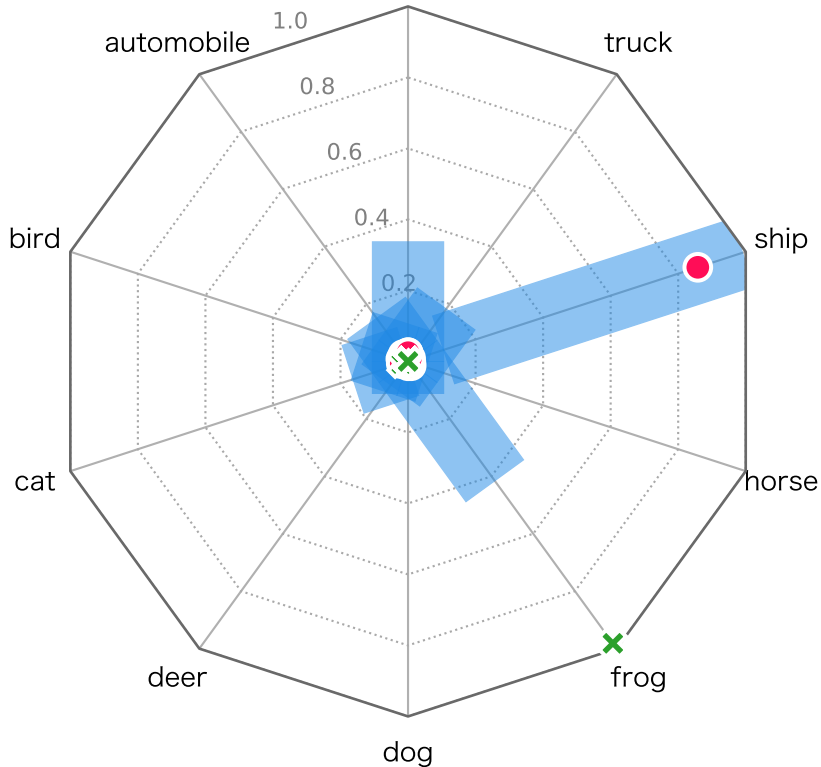

Supplement: supplementary_material [file 6239_CIFAR10_CLIP_alpha0.9_spider_plot.pdf › efficient-credal-prediction-main/paper_plots/appendix/clip_results/model_comparison/6239_CIFAR10_CLIP_alpha0.9_spider_plot.pdf]

# SigLIP2

airplane

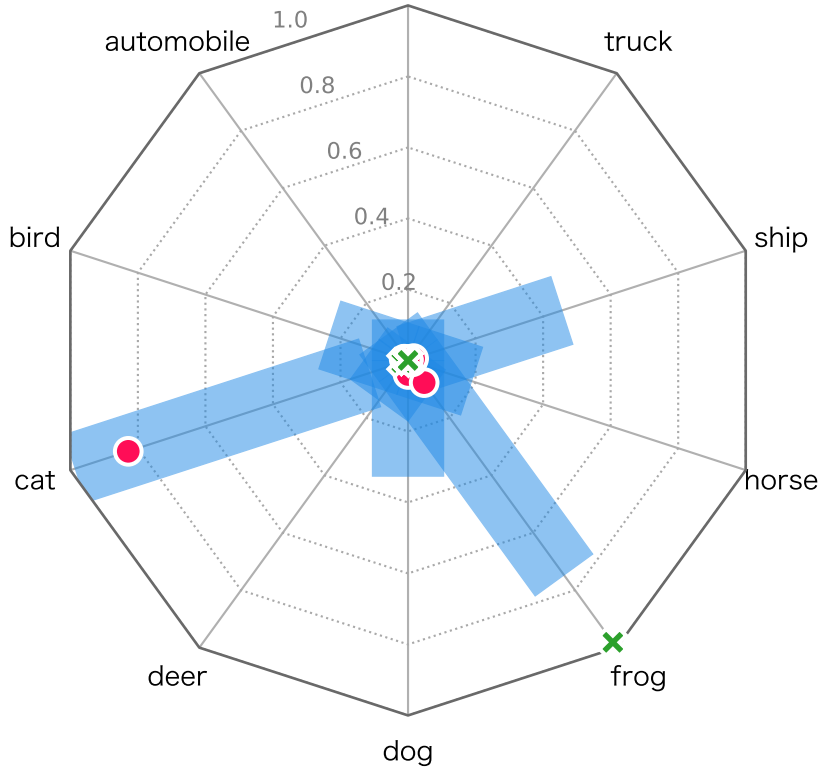

Supplement: supplementary_material [file 6239_CIFAR10_SigLIP2_alpha0.9_spider_plot.pdf › efficient-credal-prediction-main/paper_plots/appendix/clip_results/model_comparison/6239_CIFAR10_SigLIP2_alpha0.9_spider_plot.pdf]

# SigLIP

airplane

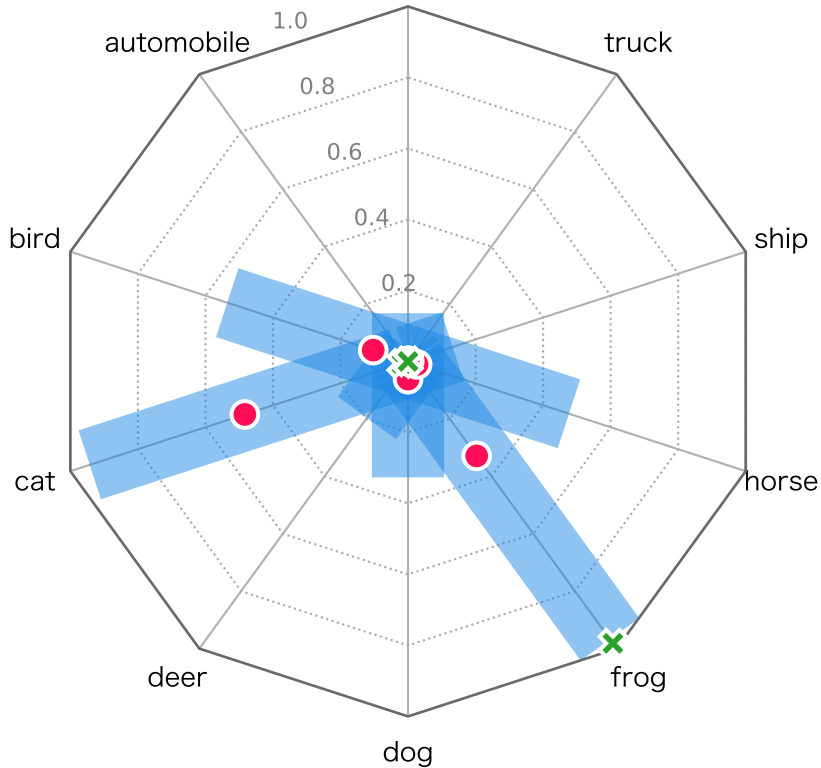

Supplement: supplementary_material [file 6239_CIFAR10_SigLIP_alpha0.9_spider_plot.pdf › efficient-credal-prediction-main/paper_plots/appendix/clip_results/model_comparison/6239_CIFAR10_SigLIP_alpha0.9_spider_plot.pdf]

CIFAR10 label: frog

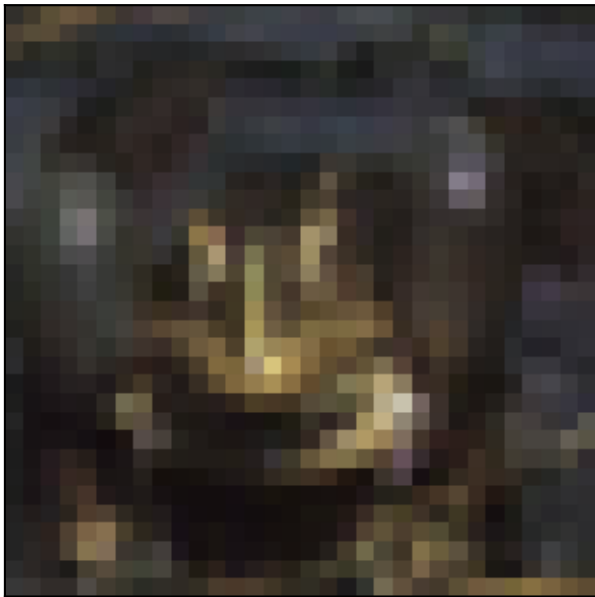

Supplement: supplementary_material [file 6239_CIFAR10_image.pdf › efficient-credal-prediction-main/paper_plots/appendix/clip_results/model_comparison/6239_CIFAR10_image.pdf]

# SigLIP2

airplane

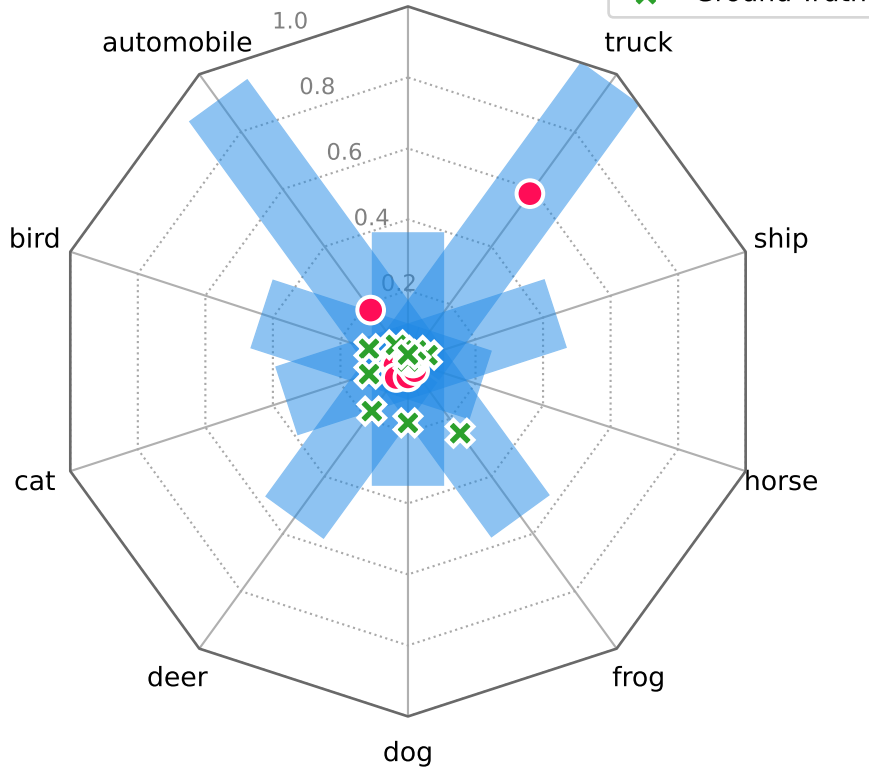

Supplement: supplementary_material [file 6750_CIFAR10_SigLIP2_alpha0.9_spider_plot.pdf › efficient-credal-prediction-main/paper_plots/appendix/clip_results/model_comparison/6750_CIFAR10_SigLIP2_alpha0.9_spider_plot.pdf]

# SigLIP

airplane

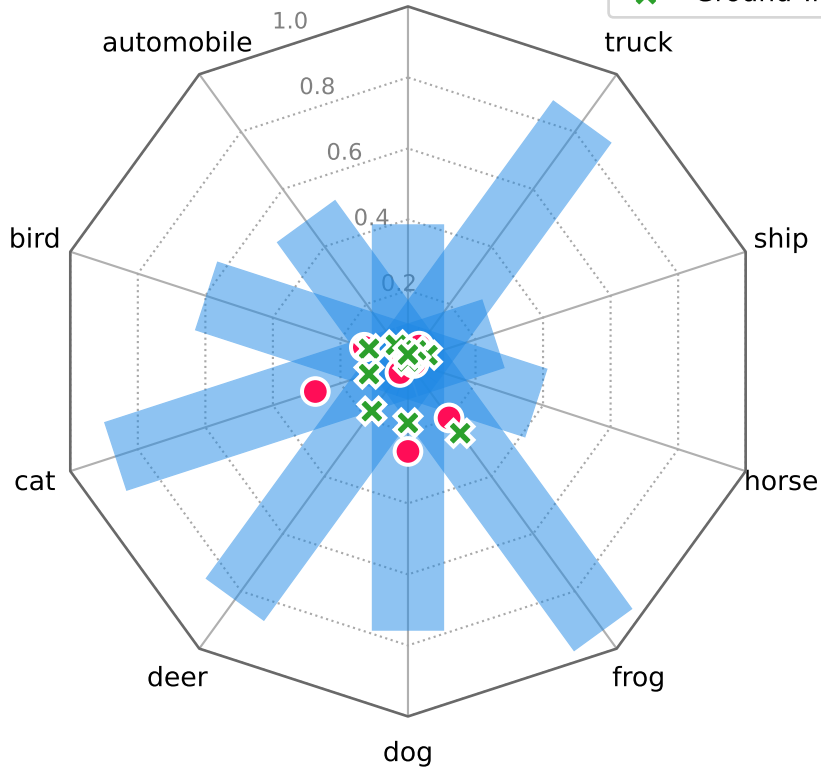

Supplement: supplementary_material [file 6750_CIFAR10_SigLIP_alpha0.9_spider_plot.pdf › efficient-credal-prediction-main/paper_plots/appendix/clip_results/model_comparison/6750_CIFAR10_SigLIP_alpha0.9_spider_plot.pdf]

CIFAR10 label: deer

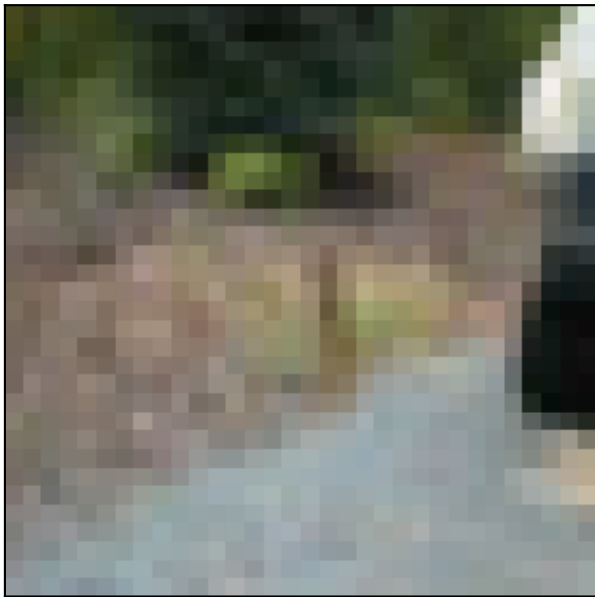

Supplement: supplementary_material [file 6750_CIFAR10_image.pdf › efficient-credal-prediction-main/paper_plots/appendix/clip_results/model_comparison/6750_CIFAR10_image.pdf]

# SigLIP2

airplane

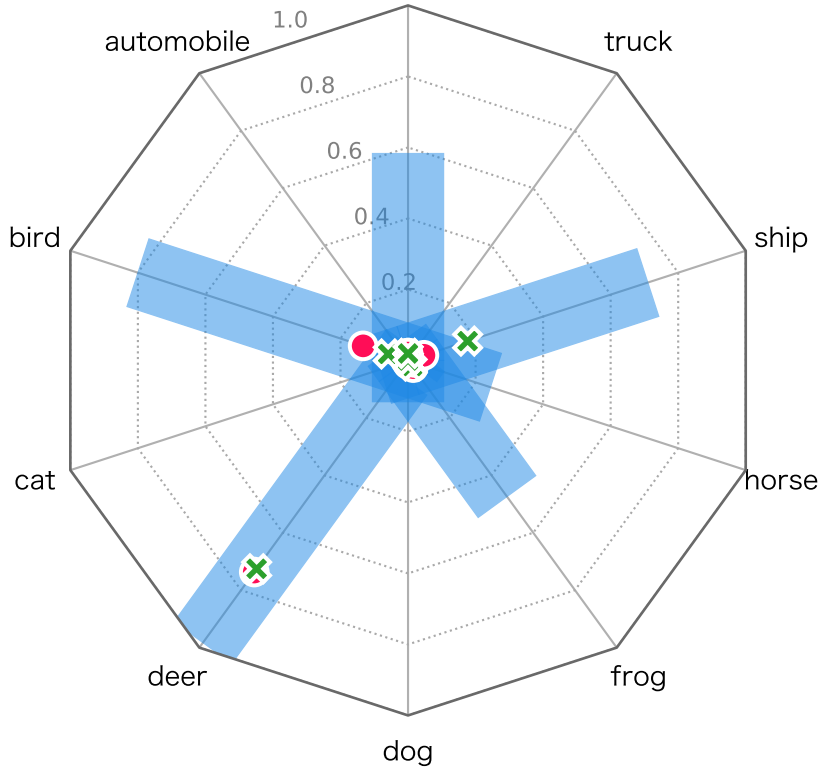

Supplement: supplementary_material [file 8854_CIFAR10_SigLIP2_alpha0.9_spider_plot.pdf › efficient-credal-prediction-main/paper_plots/appendix/clip_results/model_comparison/8854_CIFAR10_SigLIP2_alpha0.9_spider_plot.pdf]

# SigLIP

airplane

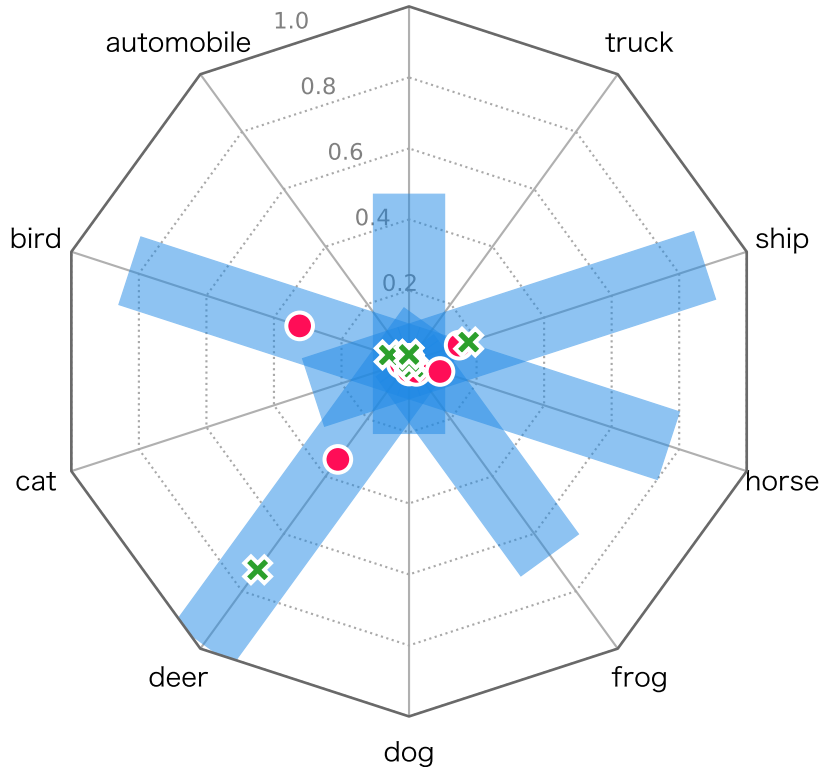

Supplement: supplementary_material [file 8854_CIFAR10_SigLIP_alpha0.9_spider_plot.pdf › efficient-credal-prediction-main/paper_plots/appendix/clip_results/model_comparison/8854_CIFAR10_SigLIP_alpha0.9_spider_plot.pdf]

# QualityMRI

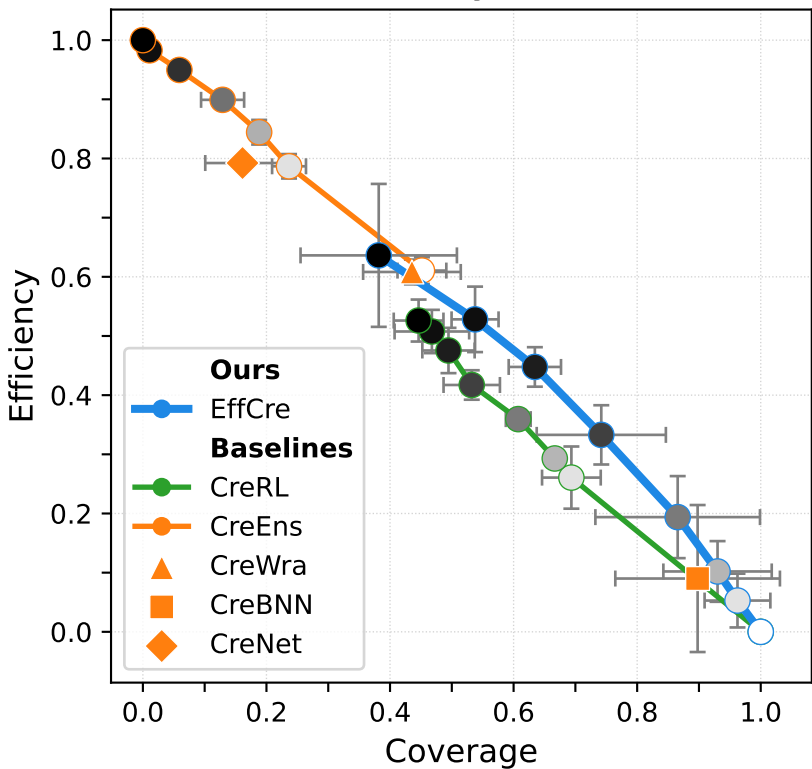

Supplement: supplementary_material [file cov_eff_qualitymri.pdf › efficient-credal-prediction-main/paper_plots/appendix/cov_eff/cov_eff_qualitymri.pdf]

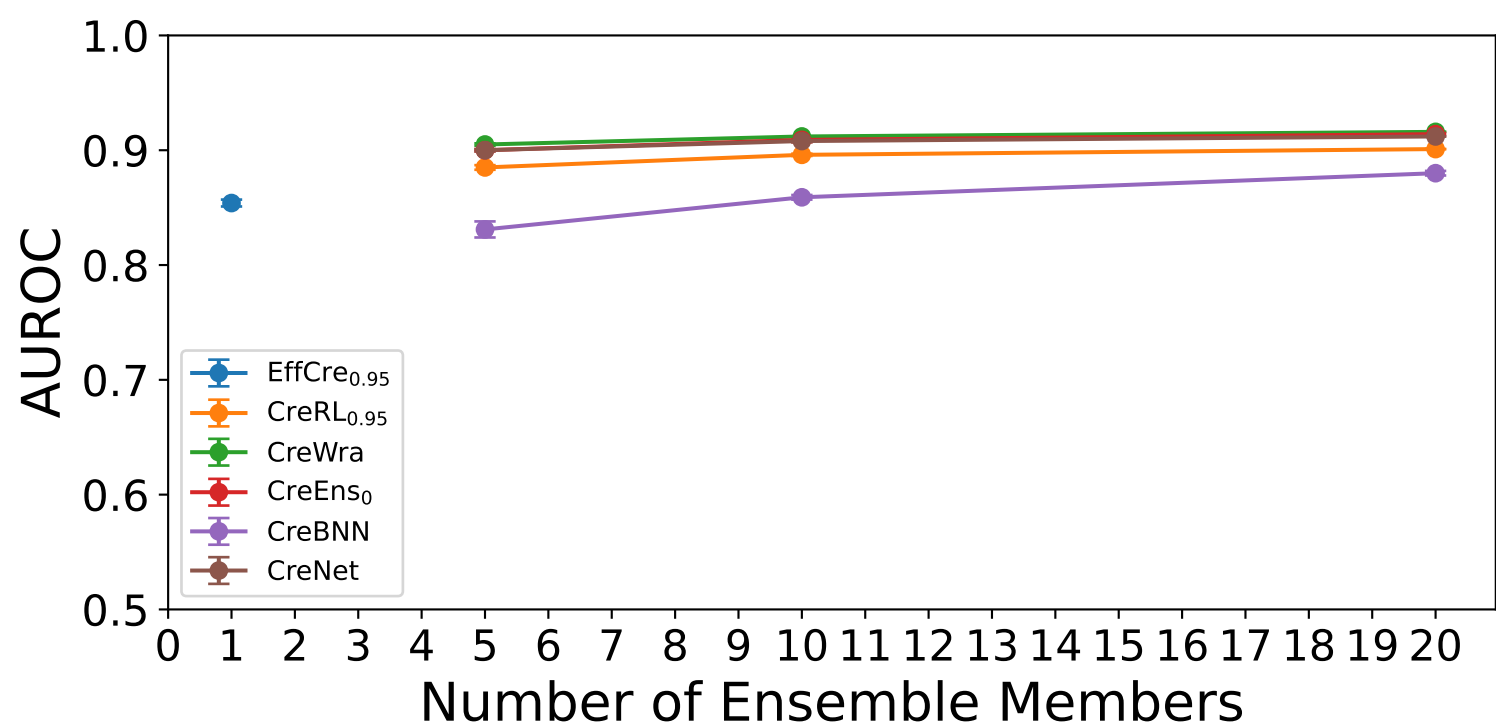

Supplement: supplementary_material [file ood_cifar10_cifar100_members.pdf › efficient-credal-prediction-main/paper_plots/appendix/ood_ablation/ood_cifar10_cifar100_members.pdf]

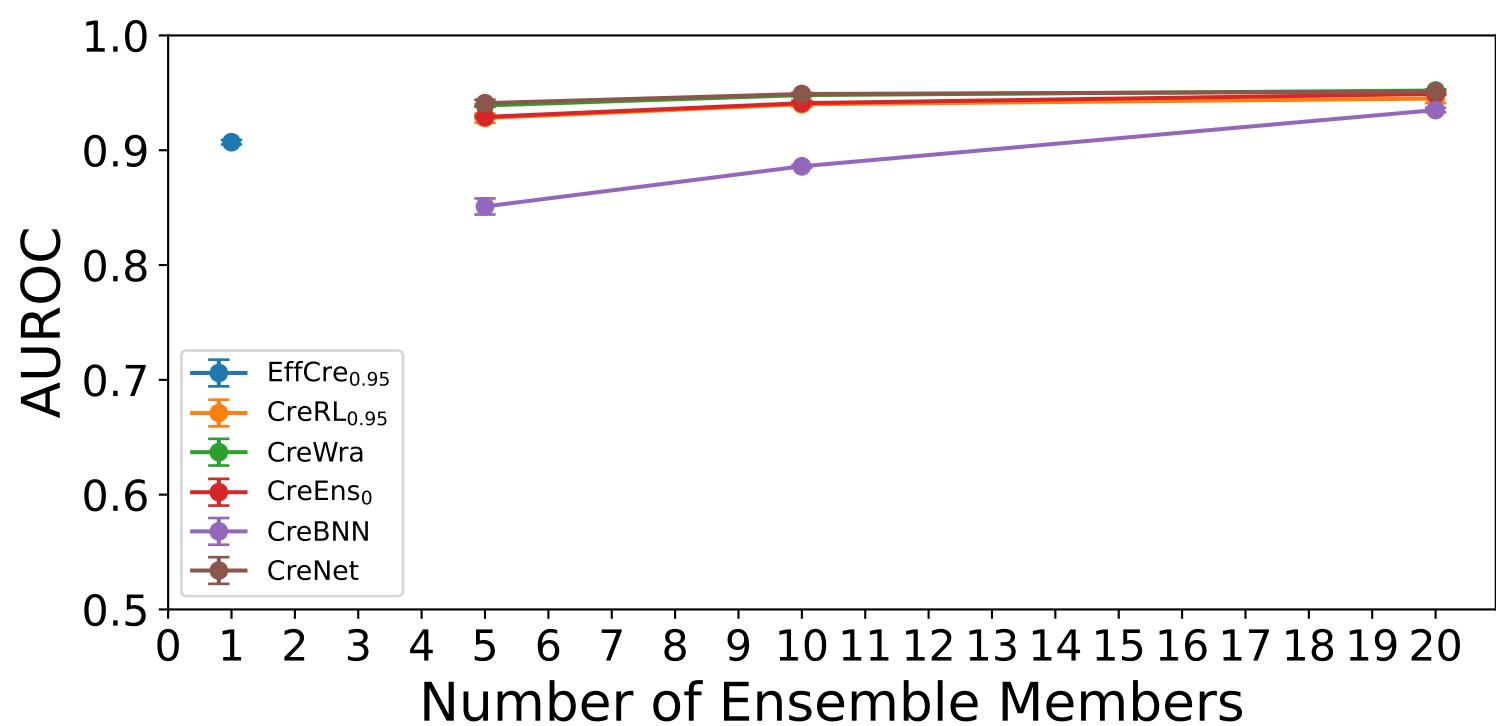

Supplement: supplementary_material [file ood_cifar10_fmnist_members.pdf › efficient-credal-prediction-main/paper_plots/appendix/ood_ablation/ood_cifar10_fmnist_members.pdf]

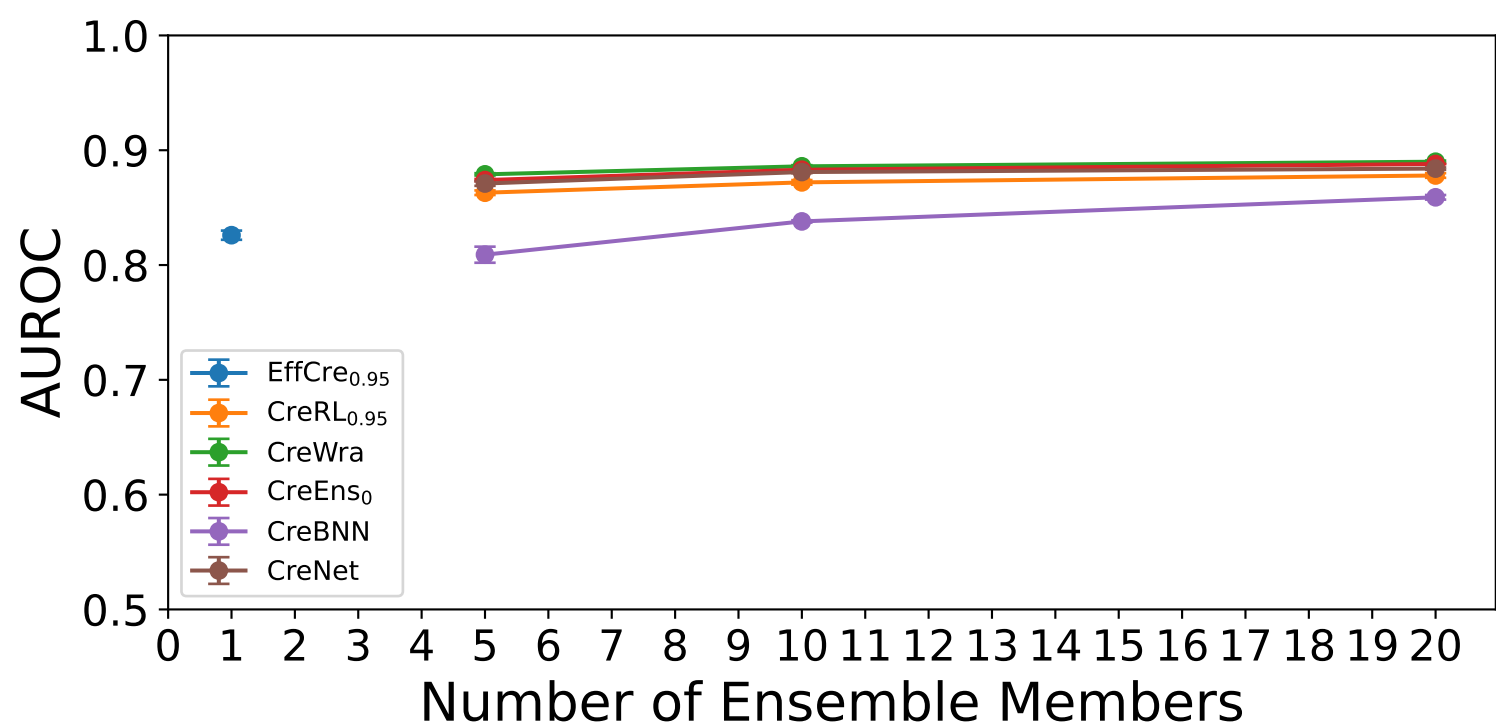

Supplement: supplementary_material [file ood_cifar10_imagenet_members.pdf › efficient-credal-prediction-main/paper_plots/appendix/ood_ablation/ood_cifar10_imagenet_members.pdf]

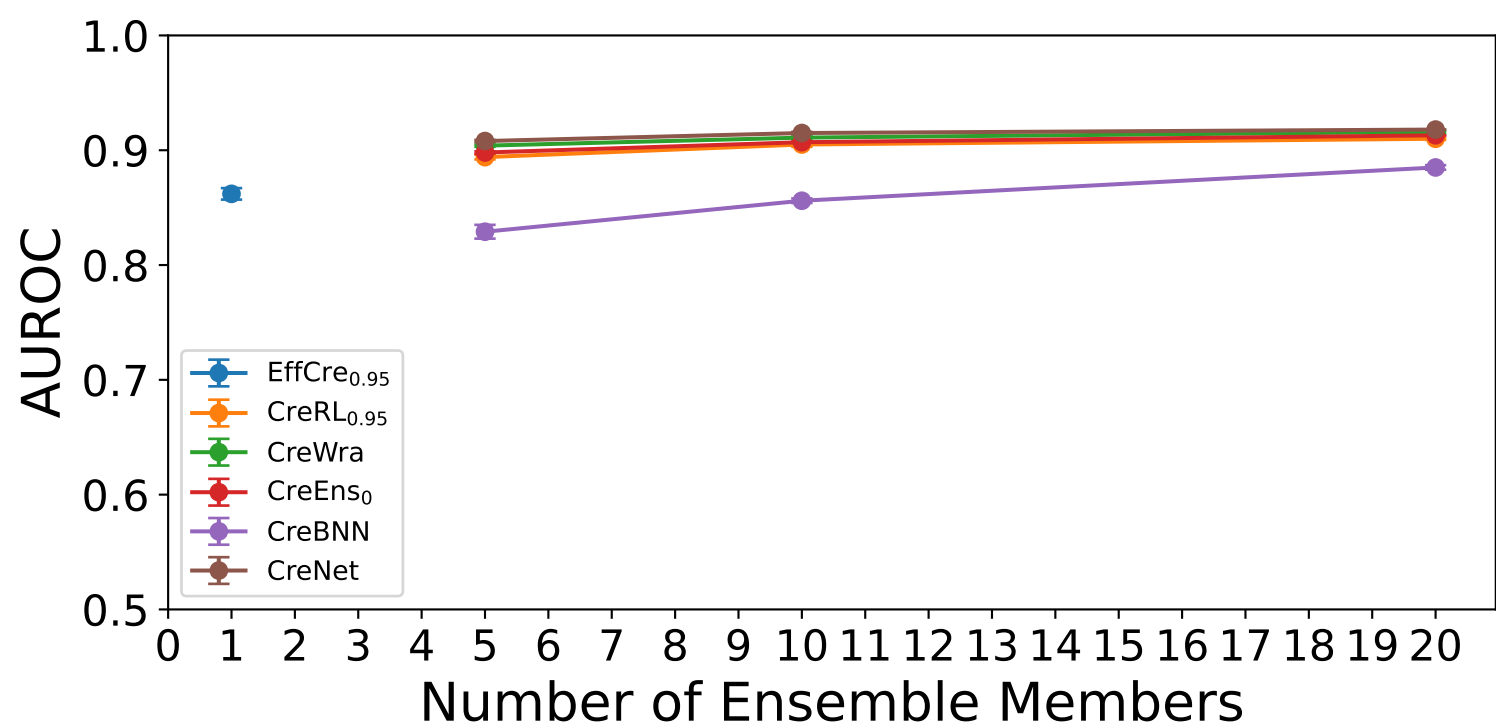

Supplement: supplementary_material [file ood_cifar10_places365_members.pdf › efficient-credal-prediction-main/paper_plots/appendix/ood_ablation/ood_cifar10_places365_members.pdf]

Active In-Context Learning (ID = 46930)

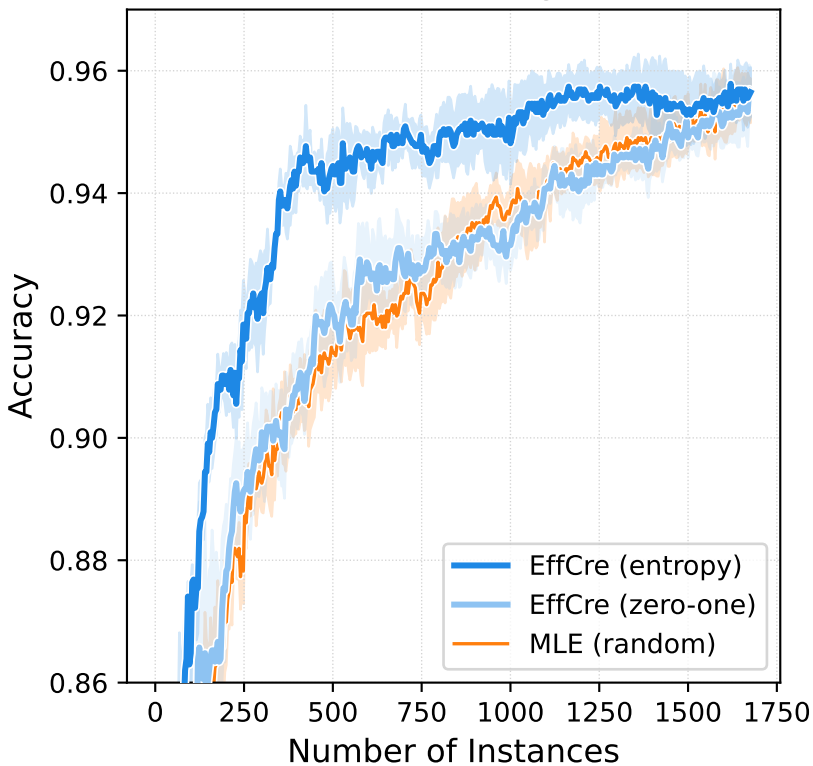

Supplement: supplementary_material [file cov_eff_Active_In-Context_Learning_(ID_=_46930).pdf › efficient-credal-prediction-main/paper_plots/appendix/tabpfn/cov_eff_Active_In-Context_Learning_(ID_=_46930).pdf]

Active In-Context Learning (ID = 46937)

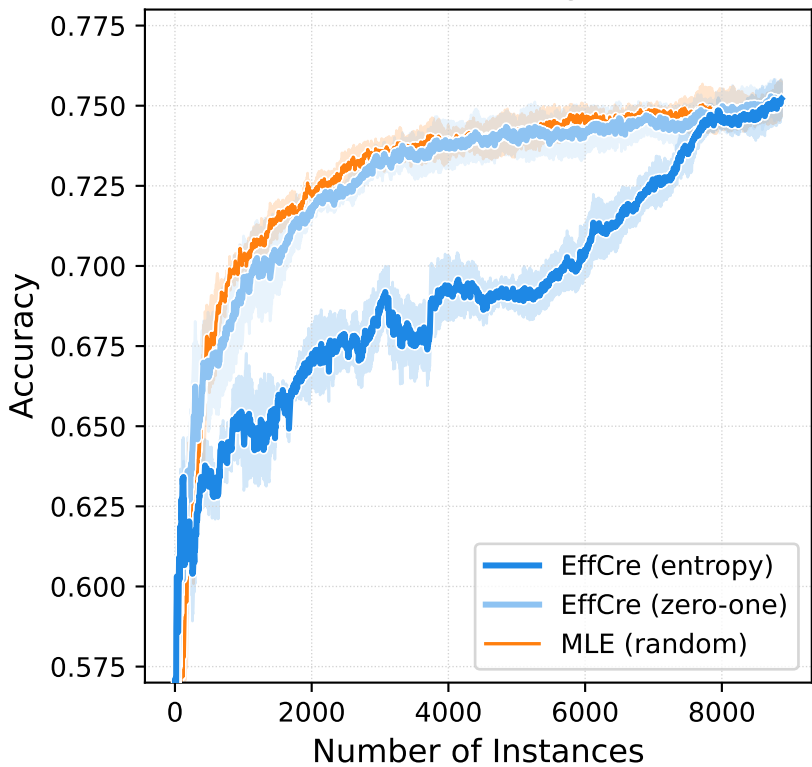

Supplement: supplementary_material [file cov_eff_Active_In-Context_Learning_(ID_=_46937).pdf › efficient-credal-prediction-main/paper_plots/appendix/tabpfn/cov_eff_Active_In-Context_Learning_(ID_=_46937).pdf]

# Active In-Context Learning (ID = 46941)

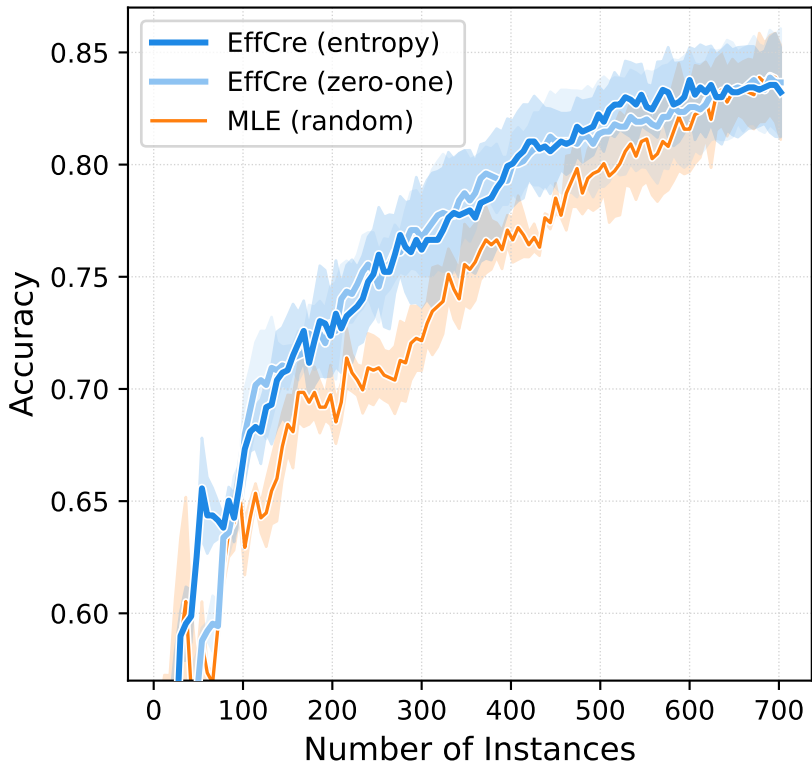

Supplement: supplementary_material [file cov_eff_Active_In-Context_Learning_(ID_=_46941).pdf › efficient-credal-prediction-main/paper_plots/appendix/tabpfn/cov_eff_Active_In-Context_Learning_(ID_=_46941).pdf]

Active In-Context Learning (ID = 46963)

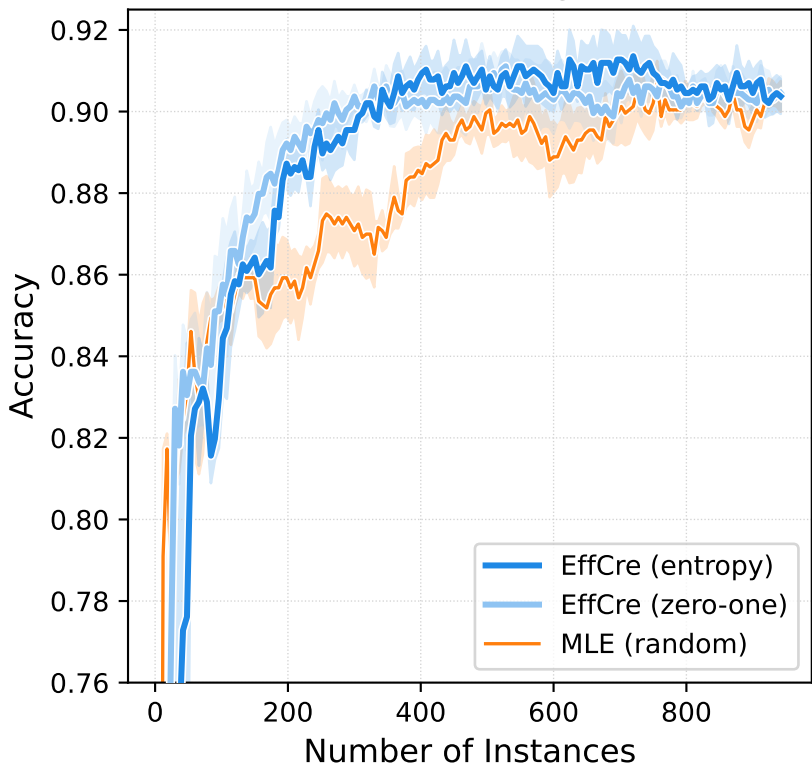

Supplement: supplementary_material [file cov_eff_Active_In-Context_Learning_(ID_=_46963).pdf › efficient-credal-prediction-main/paper_plots/appendix/tabpfn/cov_eff_Active_In-Context_Learning_(ID_=_46963).pdf]

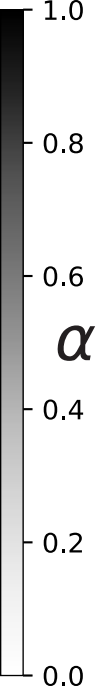

Supplement: supplementary_material [file alpha_bar.pdf › efficient-credal-prediction-main/paper_plots/main_paper/alpha_bar.pdf]

**CLIP**

airplane

● MLE

■ Credal set

✕ Ground-Truth

truck

1.0

0.8

0.6

0.4

0.2

automobile

bird

ship

cat

horse

deer

frog

dog

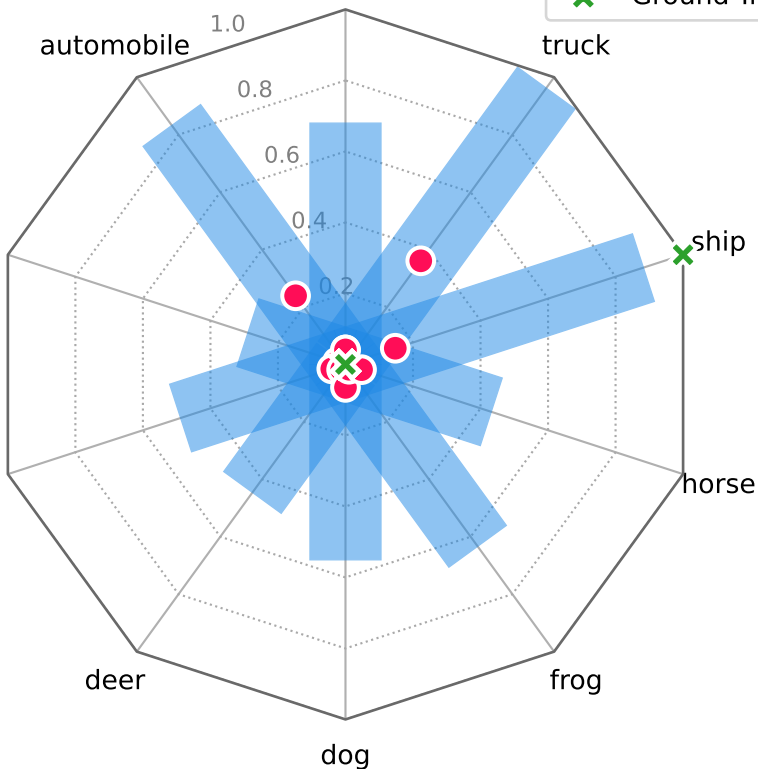

Supplement: supplementary_material [file 1600_CIFAR10_CLIP_alpha0.8_spider_plot.pdf › efficient-credal-prediction-main/paper_plots/main_paper/clip_experiment/1600_CIFAR10_CLIP_alpha0.8_spider_plot.pdf]

True label:  
ship

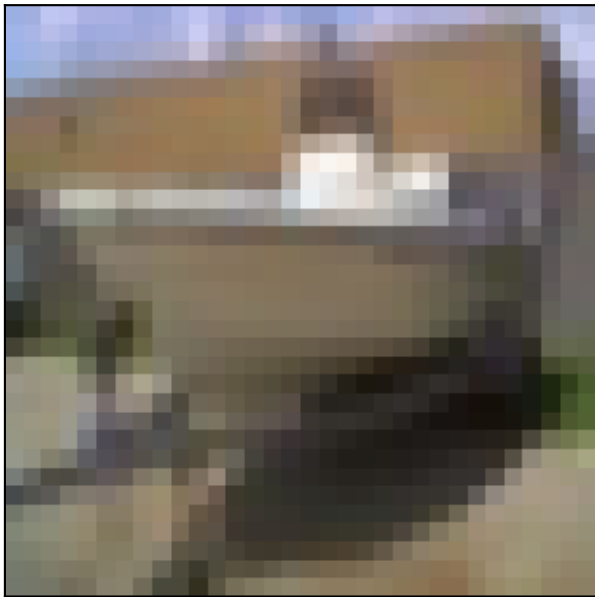

Supplement: supplementary_material [file 1600_CIFAR10_image.pdf › efficient-credal-prediction-main/paper_plots/main_paper/clip_experiment/1600_CIFAR10_image.pdf]

# CLIP

airplane

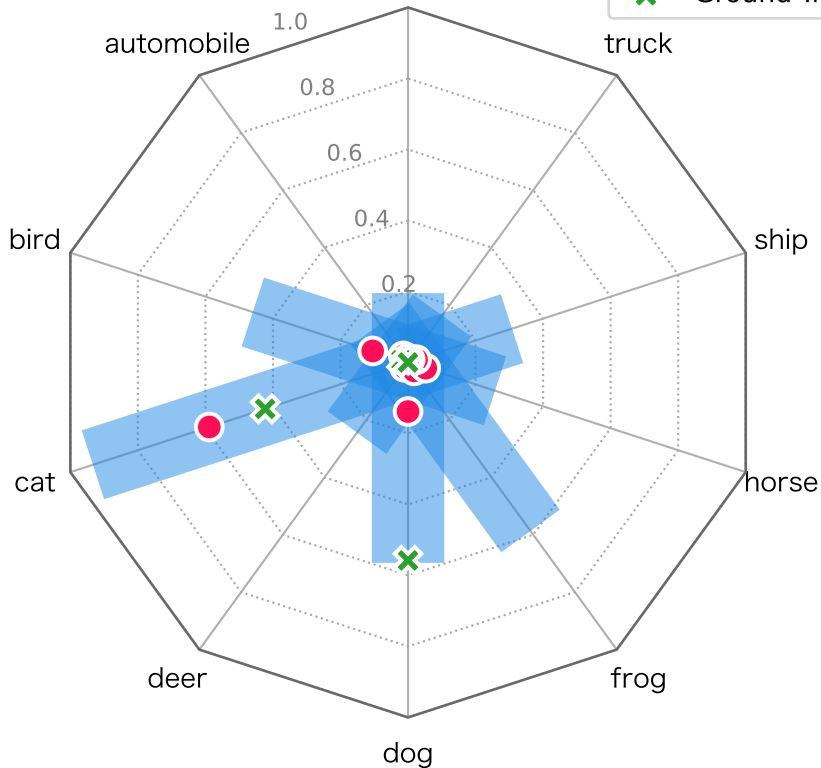

Supplement: supplementary_material [file 2187_CIFAR10_CLIP_alpha0.9_spider_plot.pdf › efficient-credal-prediction-main/paper_plots/main_paper/clip_experiment/2187_CIFAR10_CLIP_alpha0.9_spider_plot.pdf]

CIFAR10 label: dog

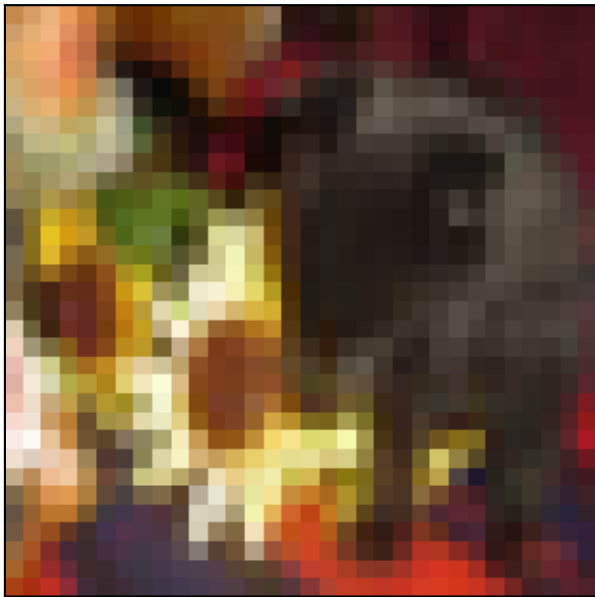

Supplement: supplementary_material [file 2187_CIFAR10_image.pdf › efficient-credal-prediction-main/paper_plots/main_paper/clip_experiment/2187_CIFAR10_image.pdf]

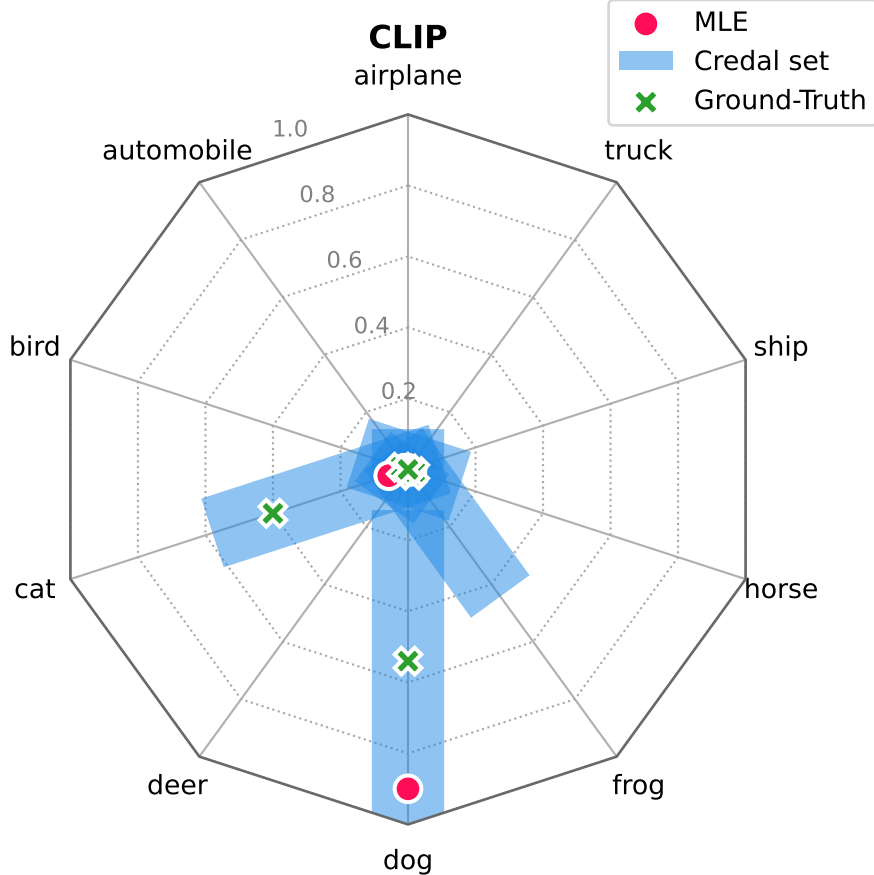

Supplement: supplementary_material [file 250_CIFAR10_CLIP_alpha0.8_spider_plot.pdf › efficient-credal-prediction-main/paper_plots/main_paper/clip_experiment/250_CIFAR10_CLIP_alpha0.8_spider_plot.pdf]

True label:  
dog

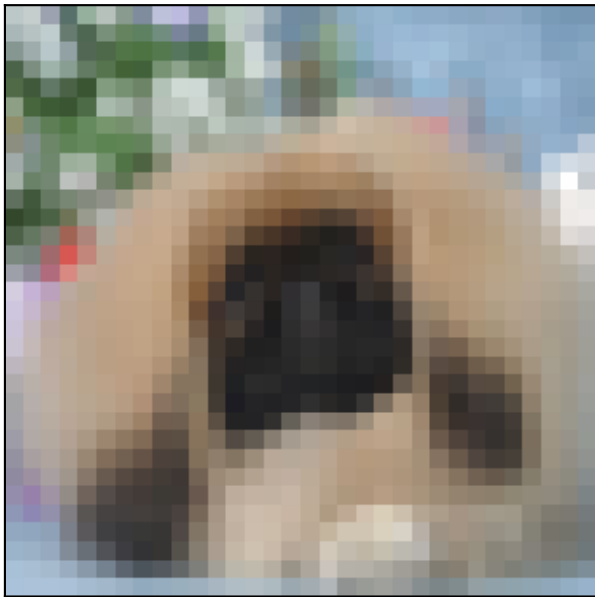

Supplement: supplementary_material [file 250_CIFAR10_image.pdf › efficient-credal-prediction-main/paper_plots/main_paper/clip_experiment/250_CIFAR10_image.pdf]

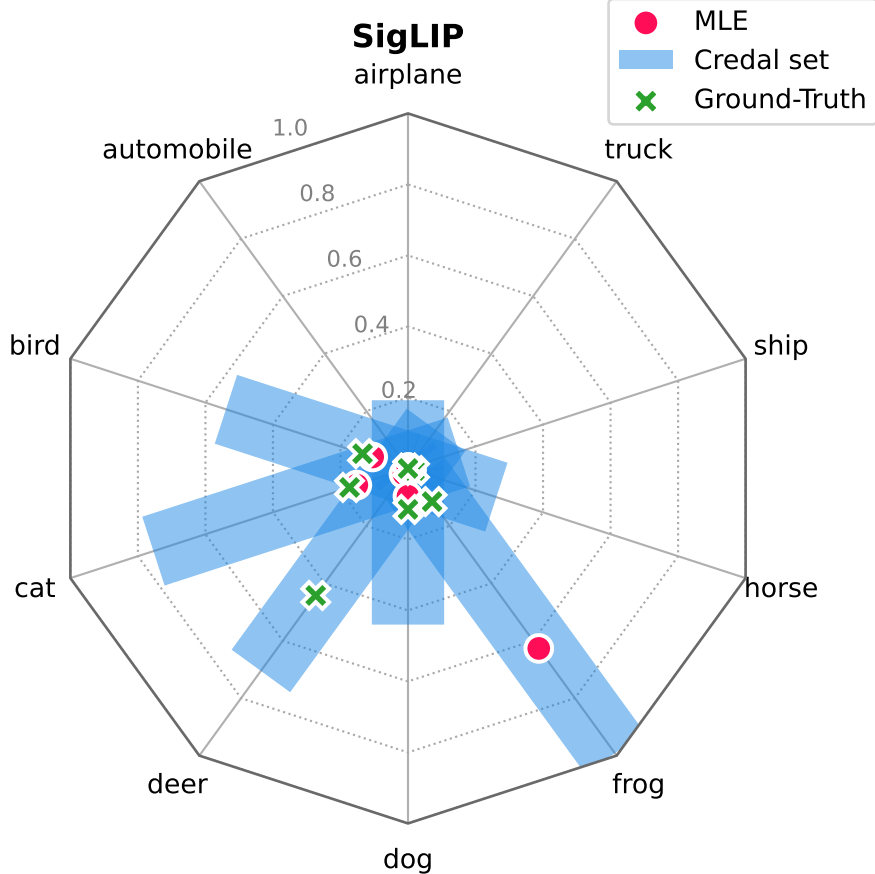

Supplement: supplementary_material [file 4821_CIFAR10_SigLIP_alpha0.9_spider_plot.pdf › efficient-credal-prediction-main/paper_plots/main_paper/clip_experiment/4821_CIFAR10_SigLIP_alpha0.9_spider_plot.pdf]

True label:  
deer

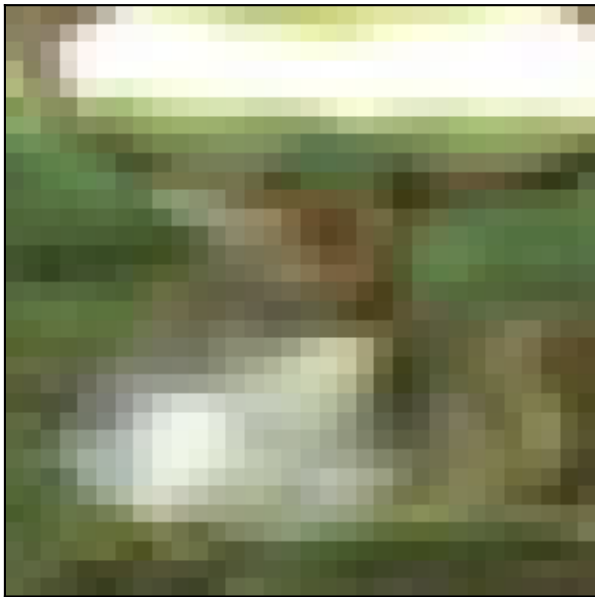

Supplement: supplementary_material [file 4821_CIFAR10_image.pdf › efficient-credal-prediction-main/paper_plots/main_paper/clip_experiment/4821_CIFAR10_image.pdf]

# SigLIP

airplane

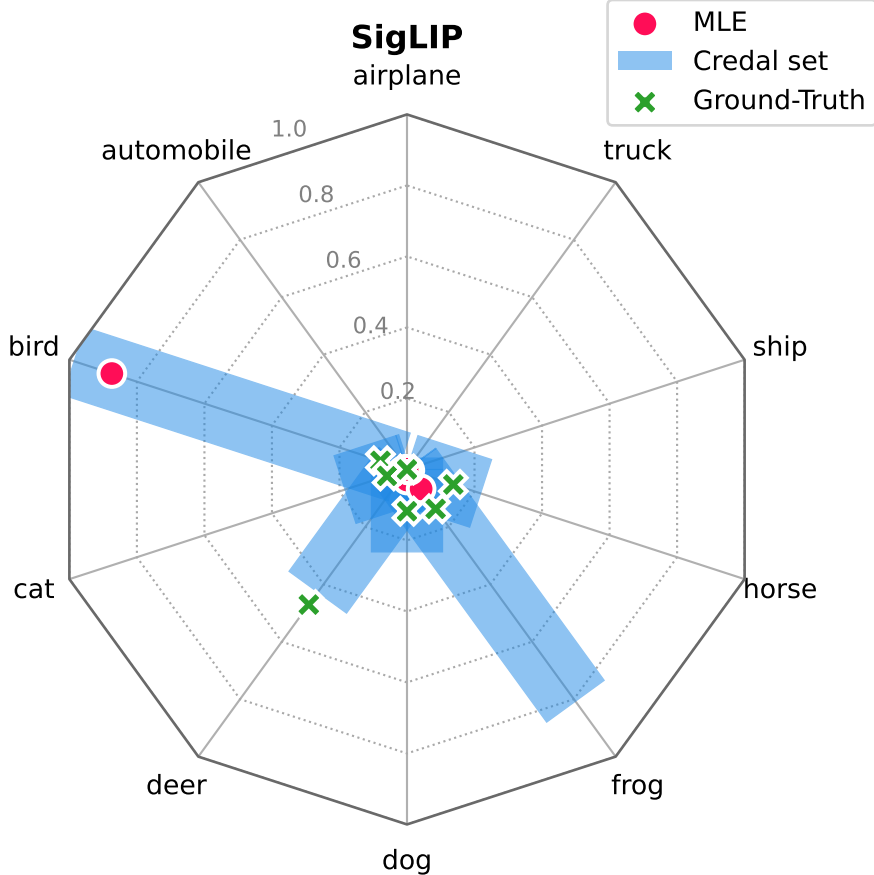

Supplement: supplementary_material [file 5227_CIFAR10_SigLIP_alpha0.9_spider_plot.pdf › efficient-credal-prediction-main/paper_plots/main_paper/clip_experiment/5227_CIFAR10_SigLIP_alpha0.9_spider_plot.pdf]

True label:  
deer



Supplement: supplementary_material [file 5227_CIFAR10_image.pdf › efficient-credal-prediction-main/paper_plots/main_paper/clip_experiment/5227_CIFAR10_image.pdf]

# CLIP

airplane

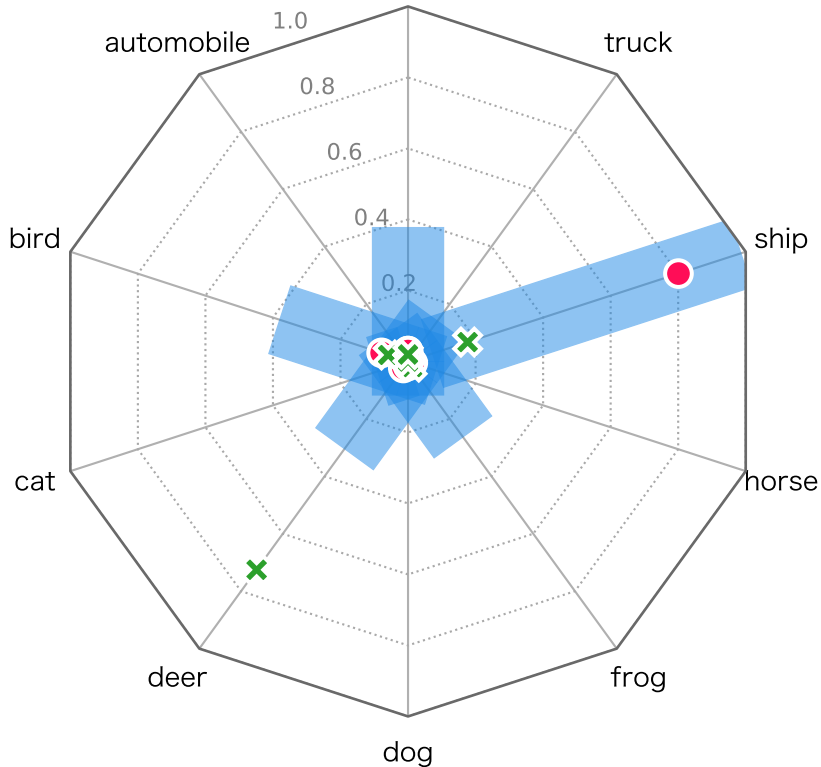

Supplement: supplementary_material [file 8854_CIFAR10_CLIP_alpha0.9_spider_plot.pdf › efficient-credal-prediction-main/paper_plots/main_paper/clip_experiment/8854_CIFAR10_CLIP_alpha0.9_spider_plot.pdf]

CIFAR10 label: deer

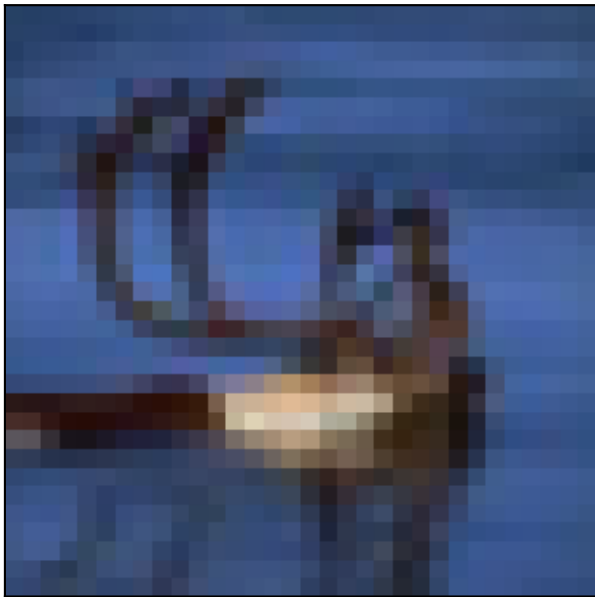

Supplement: supplementary_material [file 8854_CIFAR10_image.pdf › efficient-credal-prediction-main/paper_plots/main_paper/clip_experiment/8854_CIFAR10_image.pdf]

# SigLIP

airplane

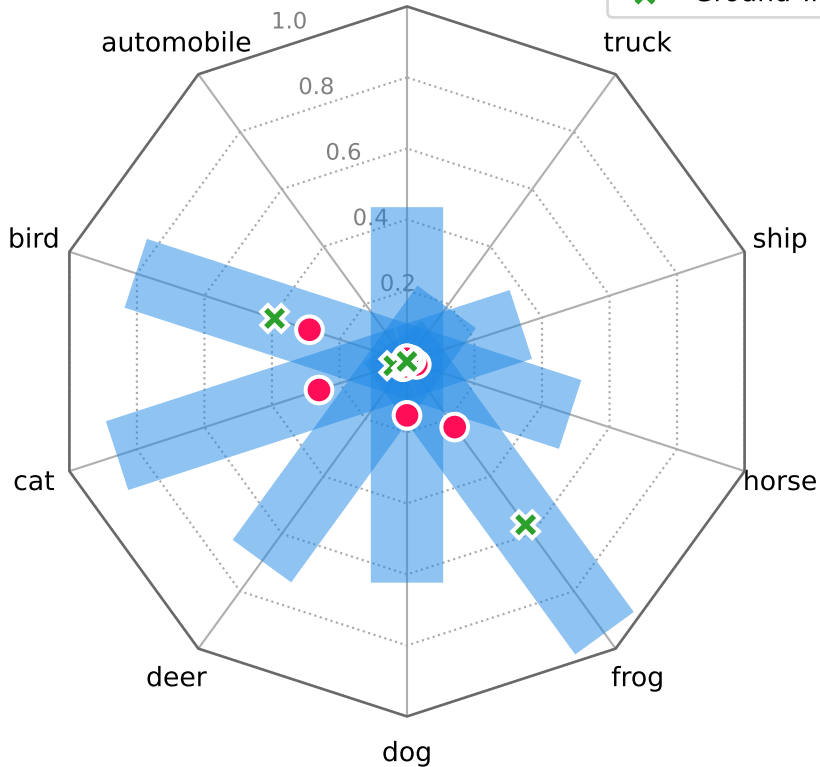

Supplement: supplementary_material [file 9216_CIFAR10_SigLIP_alpha0.9_spider_plot.pdf › efficient-credal-prediction-main/paper_plots/main_paper/clip_experiment/9216_CIFAR10_SigLIP_alpha0.9_spider_plot.pdf]

True label:  
frog

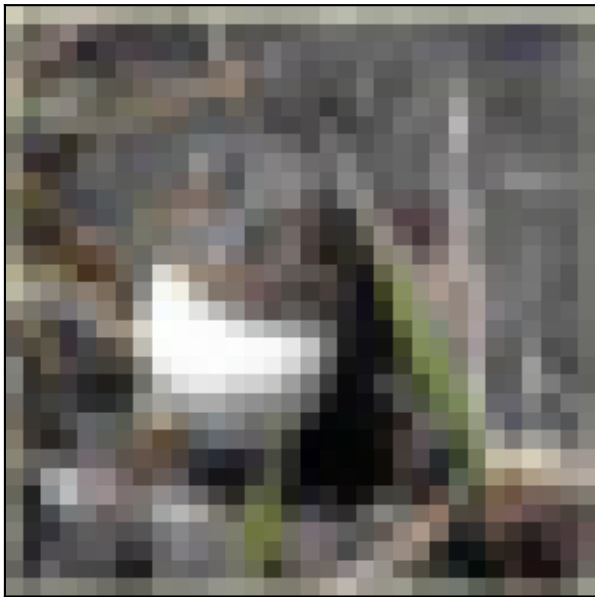

Supplement: supplementary_material [file 9216_CIFAR10_image.pdf › efficient-credal-prediction-main/paper_plots/main_paper/clip_experiment/9216_CIFAR10_image.pdf]

## Input to CLIP

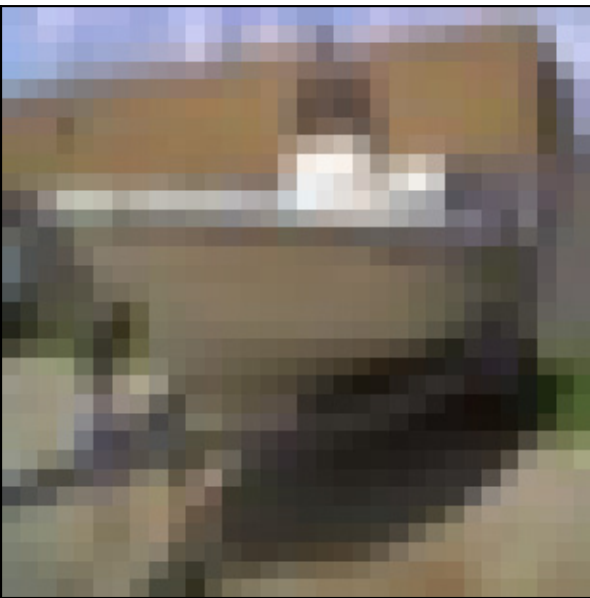

A photo of a [LABEL].

## CLIP Credal Sets

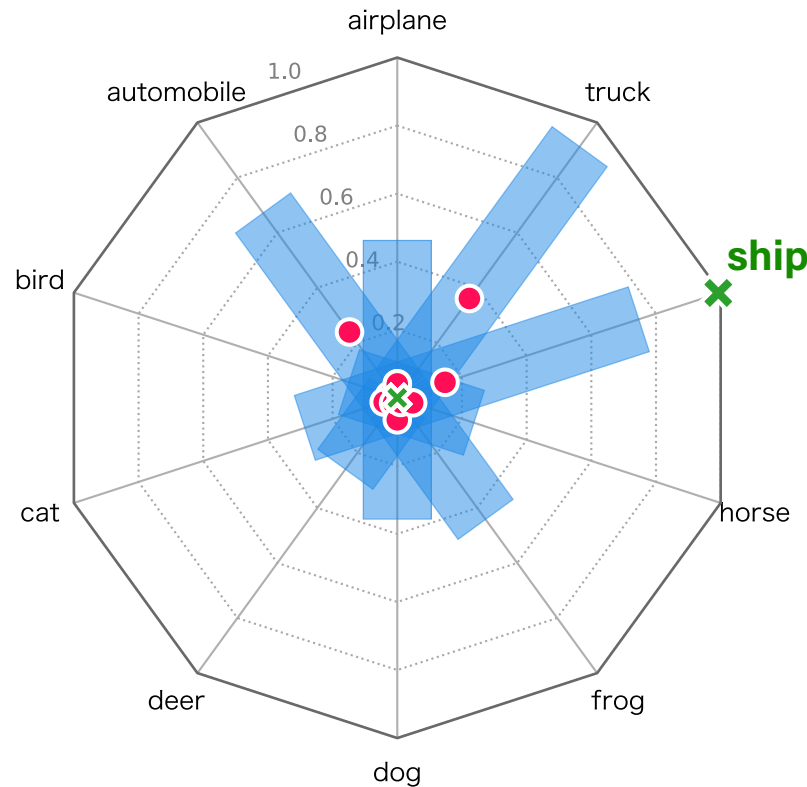

## Input to CLIP

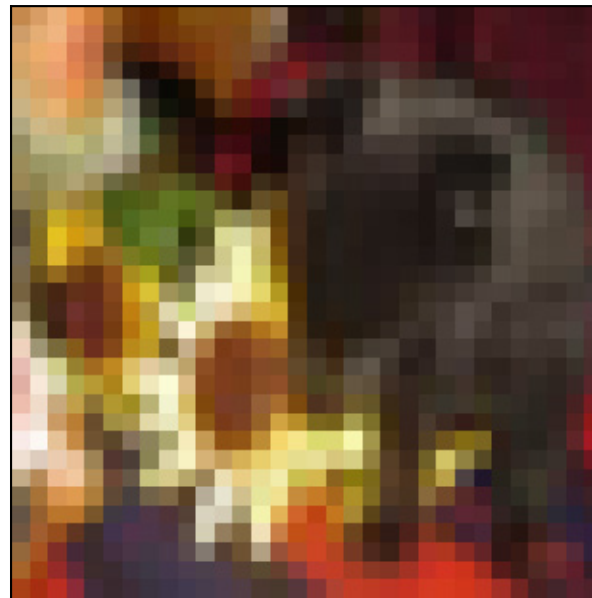

A photo of a [LABEL].

## CLIP Credal Sets

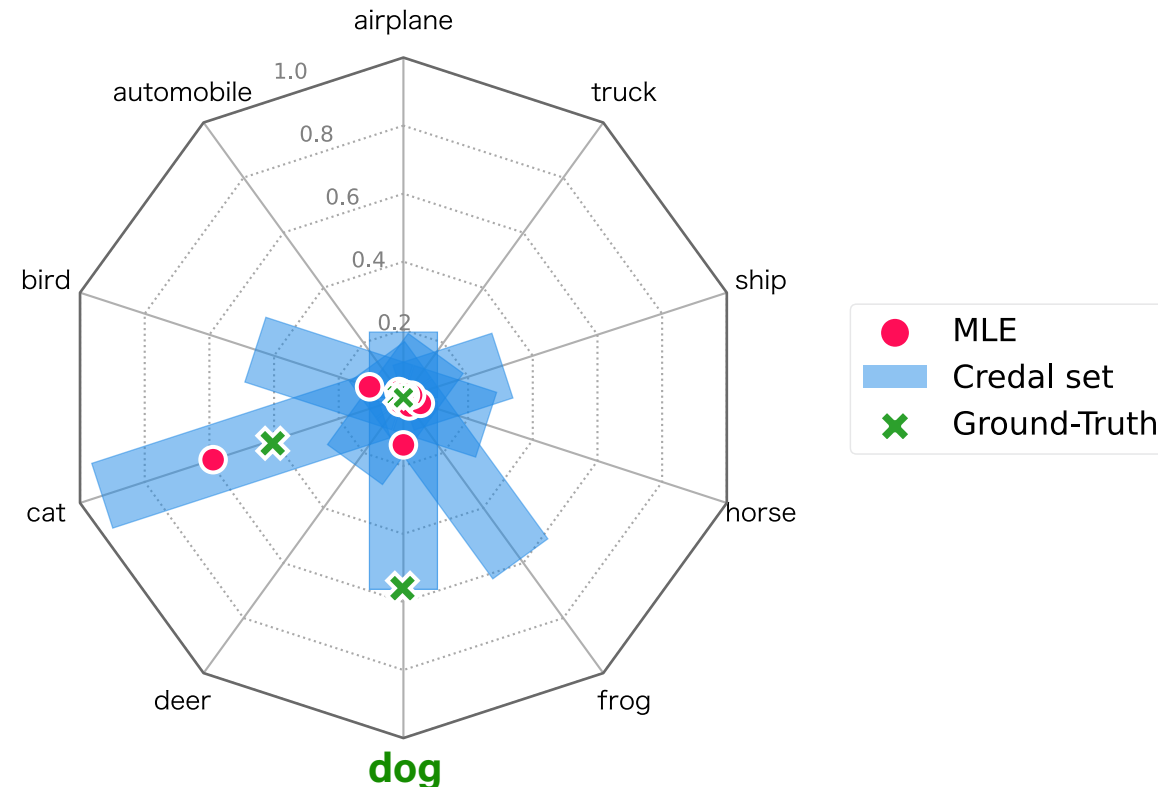

Supplement: supplementary_material [file clip_main_paper_antibox.pdf › efficient-credal-prediction-main/paper_plots/main_paper/clip_experiment/clip_main_paper_antibox.pdf]

## Input to CLIP



A photo of a [LABEL].

## CLIP Credal Sets



## Input to CLIP



A photo of a [LABEL].

## CLIP Credal Sets



Supplement: supplementary_material [file clip_main_paper_antibox_nocolor.pdf › efficient-credal-prediction-main/paper_plots/main_paper/clip_experiment/clip_main_paper_antibox_nocolor.pdf]

# CIFAR-10

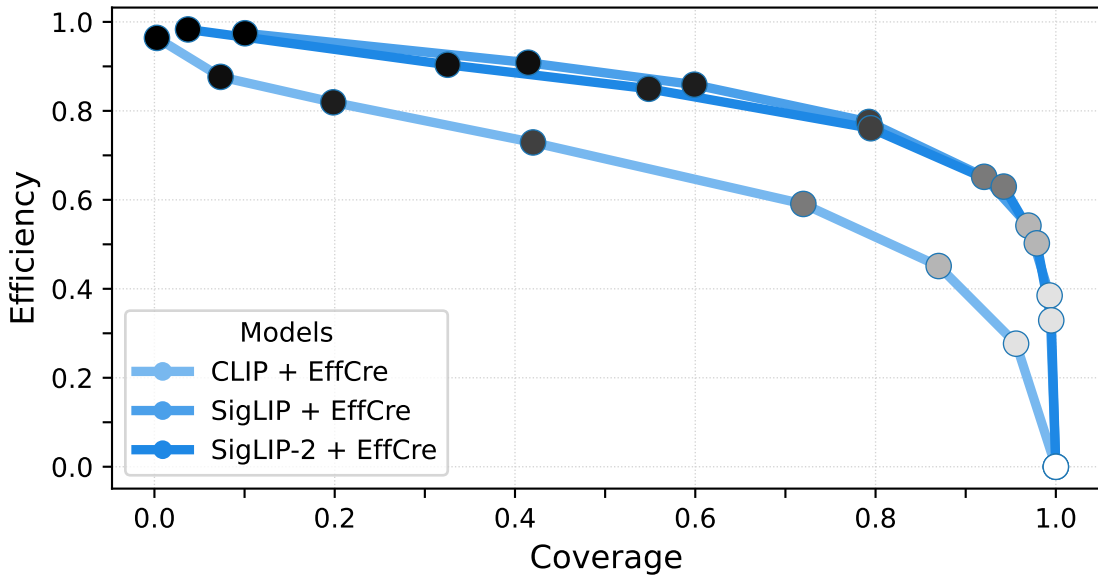

Supplement: supplementary_material [file cov_eff_CIFAR-10.pdf › efficient-credal-prediction-main/paper_plots/main_paper/clip_experiment/cov_eff_CIFAR-10.pdf]

# CIFAR-10

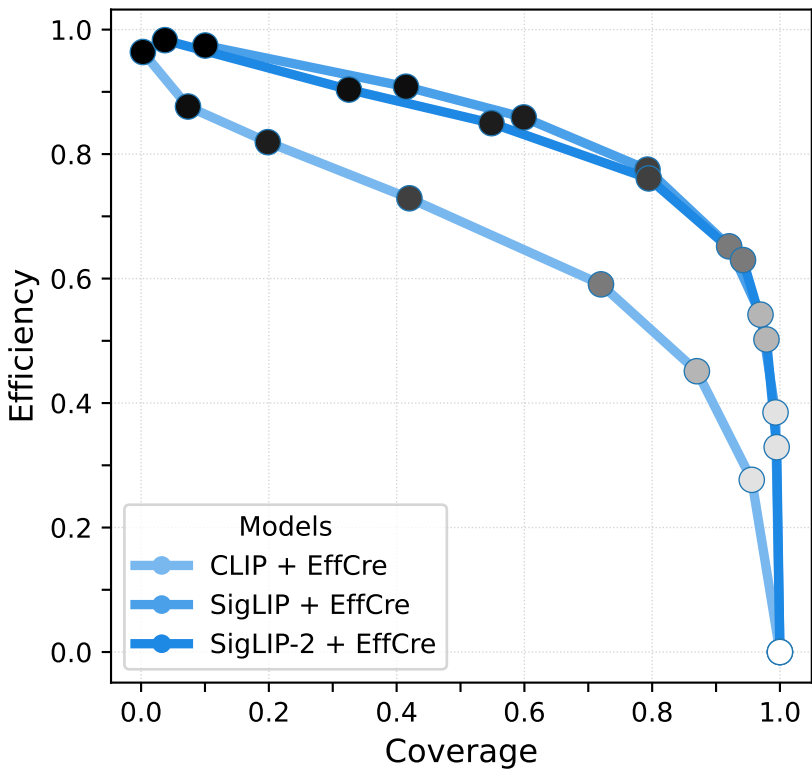

Supplement: supplementary_material [file cov_eff_CIFAR-10_clip.pdf › efficient-credal-prediction-main/paper_plots/main_paper/clip_experiment/cov_eff_CIFAR-10_clip.pdf]

# ChaosNLI

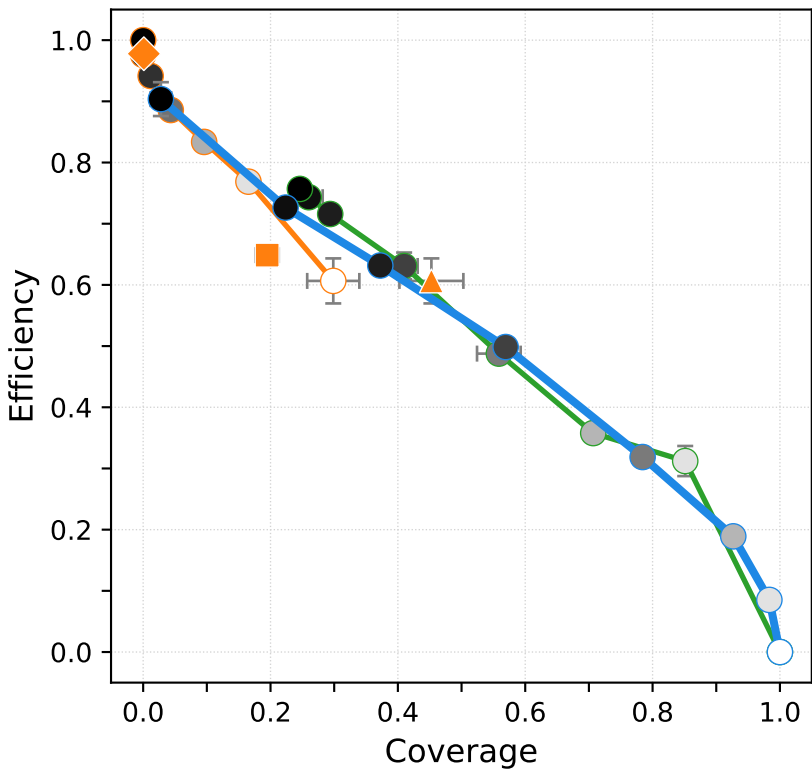

Supplement: supplementary_material [file cov_eff_chaosnli.pdf › efficient-credal-prediction-main/paper_plots/main_paper/cov_eff/cov_eff_chaosnli.pdf]

**CIFAR-10H**

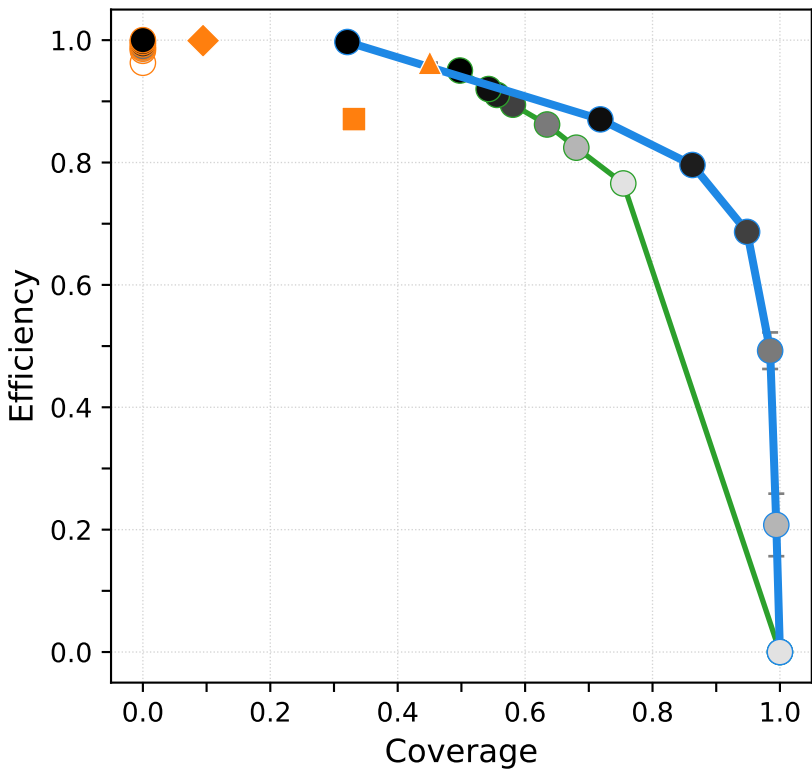

Supplement: supplementary_material [file cov_eff_cifar10.pdf › efficient-credal-prediction-main/paper_plots/main_paper/cov_eff/cov_eff_cifar10.pdf]

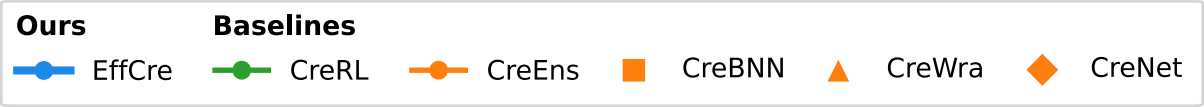

Supplement: supplementary_material [file legend.pdf › efficient-credal-prediction-main/paper_plots/main_paper/cov_eff/legend.pdf]

# Out-of-Distribution Detection

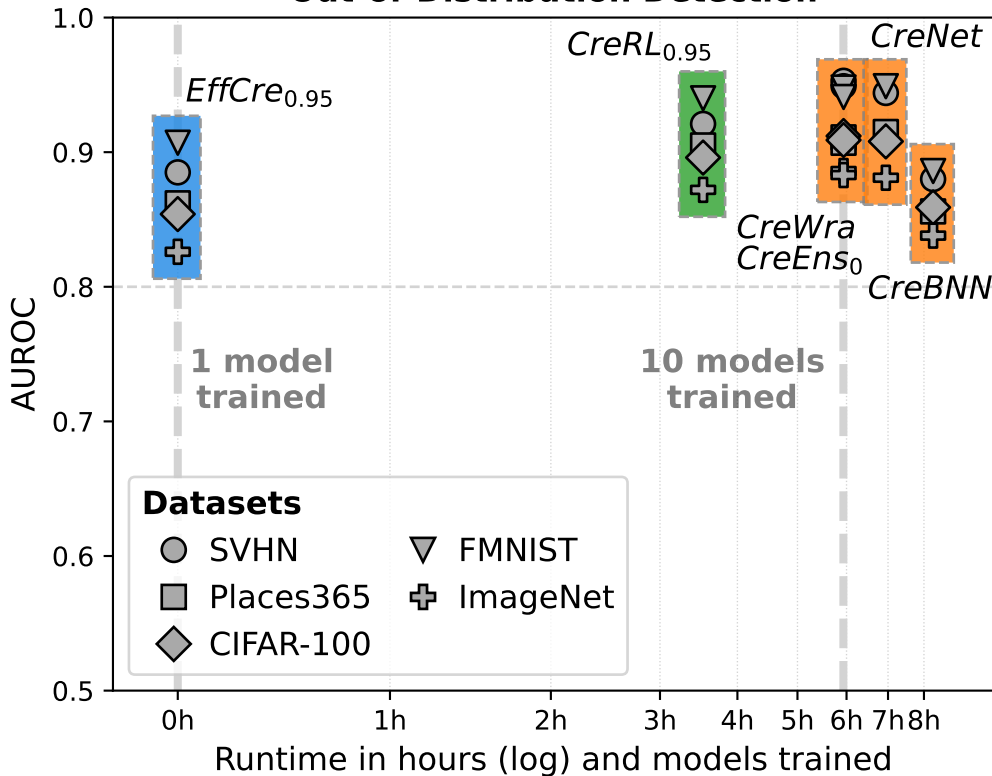

Supplement: supplementary_material [file ood_runtime.pdf › efficient-credal-prediction-main/paper_plots/main_paper/ood/ood_runtime.pdf]

## Active In-Context Learning (ID = 46941)

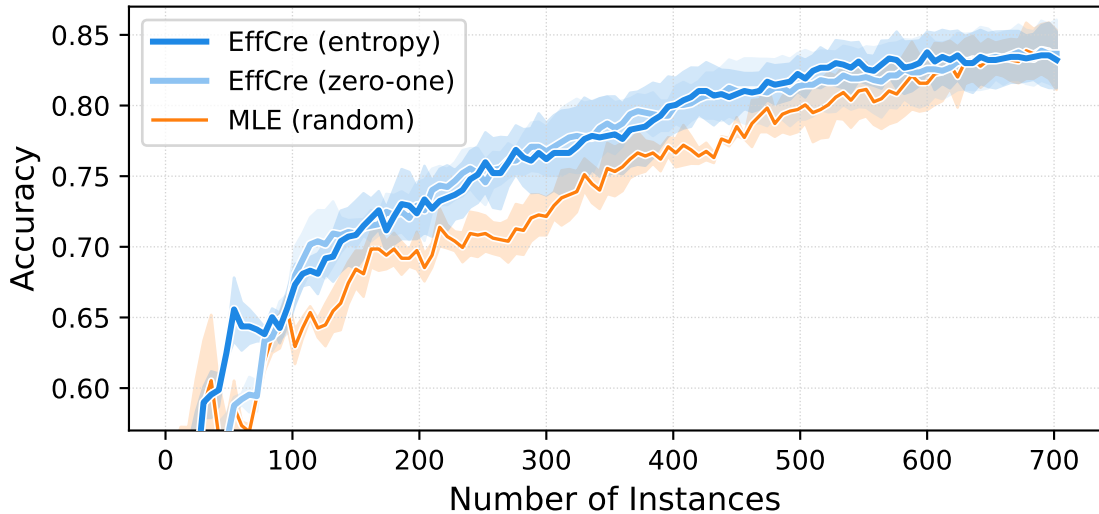

Supplement: supplementary_material [file cov_eff_Active_In-Context_Learning_(ID_=_46941)_mainpaper.pdf › efficient-credal-prediction-main/paper_plots/main_paper/tabpfn/cov_eff_Active_In-Context_Learning_(ID_=_46941)_mainpaper.pdf]

# TabPFN + EffCre

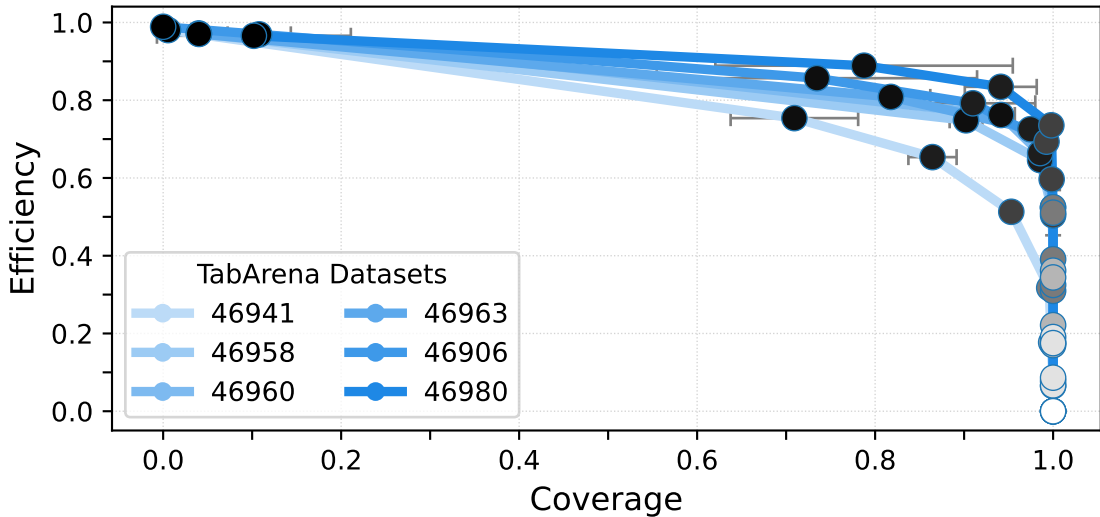

Supplement: supplementary_material [file cov_eff_TabPFN_+_EffCre.pdf › efficient-credal-prediction-main/paper_plots/main_paper/tabpfn/cov_eff_TabPFN_+_EffCre.pdf]
